# Supplementary material for: Synthesis of “all-in-one” hypercrosslinked organic polymers: experimental and kinetic models for CO2 chemical fixation and iodine adsorption
Source: Royal Society of Chemistry journal article supplement (doi:10.1039/d4se01033g), 2024-01-01
Supplement: d4se01033g1.xlsx [file d4se01033g1.xlsx]

## Sheet: Fig.3
Fig. 3							Fig. 3
HCPOH-C0				HCPOH-C0			HCPOH-C12				HCPOH-C12
P/P0	Adsorption	P/P0	Desorption	pore size distribution	dv/dD		P/P0	Adsorption	P/P0	Desorption	pore size distribution	dv/dD
1.83801e-05	30.4848	0.99951	186.548	2000.17	5.60152e-06		2.28197e-05	14.9625	0.99309	139.254	122.434	2.43557e-05
0.000993409	60.7351	0.98128	172.815	75.8632	0.000285477		0.000397414	29.8928	0.95656	137.286	58.0207	7.08296e-05
0.01244	84.7417	0.95649	162.686	36.8829	0.000596666		0.003	44.0452	0.93144	136.732	36.6214	0.000141251
0.04223	98.1814	0.92556	156.243	23.3931	0.000956022		0.00485	48.2411	0.908	136.488	26.5394	0.000220936
0.08666	104.443	0.89271	151.92	17.0257	0.00143		0.00955	56.0857	0.88471	136.413	20.7777	0.00027932
0.12501	108.936	0.85841	148.469	13.3407	0.00196		0.02384	64.3023	0.86159	136.415	17.0526	0.000413305
0.16499	112.342	0.8238	145.632	10.9499	0.00259		0.04286	70.8748	0.83846	136.48	14.4725	0.000630613
0.20594	115.264	0.78836	143.128	9.25908	0.00342		0.05813	73.9427	0.81537	136.578	12.5548	0.000963704
0.24711	117.583	0.75253	140.805	7.99581	0.00413		0.06772	75.8713	0.7923	136.72	11.0731	0.00173
0.28708	120.112	0.71574	138.695	7.03196	0.00523		0.08388	78.3352	0.76923	136.893	9.90405	0.00252
0.32711	121.532	0.68059	136.765	6.28441	0.00632		0.09873	80.4504	0.74614	137.099	8.94988	0.00358
0.37376	123.349	0.64548	134.932	5.54519	0.00665		0.11398	82.3103	0.7231	137.324	8.15414	0.0049
0.42097	125.107	0.59219	132.599	4.82606	0.00855		0.12938	83.8957	0.70008	137.551	7.48582	0.00612
0.46671	127.225	0.5395	130.378	4.25671	0.01167		0.14438	85.4456	0.67703	137.8	6.9097	0.00718
0.51204	129.107	0.48712	128.072	3.78938	0.01474		0.15969	86.8106	0.65405	138.016	6.40971	0.00855
0.5549	130.812	0.43492	125.753	3.39591	0.01535		0.17484	88.1367	0.631	138.236	5.97154	0.00923
0.59675	132.715	0.38317	123.7	3.04197	0.0175		0.18969	89.4086	0.60801	138.442	5.58088	0.01061
0.65079	135.156	0.32643	121.508	2.72419	0.02342		0.20487	90.5622	0.58502	138.639	5.23332	0.01153
0.69011	136.955	0.27323	119.235	2.45065	0.04152		0.21992	91.665	0.56204	138.807	4.91919	0.01224
0.72882	138.927	0.22173	116.153	2.20349	0.05051		0.23476	92.7296	0.53904	138.956	4.6335	0.0135
0.76607	140.98	0.17186	112.832				0.24972	93.7764	0.51612	139.048	4.37543	0.01353
0.81966	144.054						0.26468	94.8099	0.49385	138.742	4.14165	0.01407
0.86439	147.411						0.2798	95.763	0.48923	138.484	3.98678	0.01747
0.90764	151.736						0.29482	96.6882	0.47067	130.616	3.86945	0.01781
0.94615	157.781						0.30973	97.5952	0.44721	122.177	3.73778	0.01712
0.97934	168.299						0.32473	98.4878	0.41886	118.596	3.61142	0.01829
0.99951	186.548						0.33965	99.4186	0.38289	116.069	3.49063	0.01948
							0.35436	100.31	0.35765	114.65	3.37635	0.01967
							0.36928	101.196	0.35195	114.245	3.26496	0.02123
							0.38438	102.03	0.32826	113.119	3.15852	0.02532
							0.39902	102.995	0.30661	112.085	3.05694	0.02027
							0.41446	103.918	0.28313	110.914	2.9582	0.02347
							0.42917	104.778	0.26008	109.741	2.86408	0.025
							0.44418	105.678	0.23713	108.513	2.77289	0.02688
							0.45923	106.569	0.21414	107.219	2.68367	0.02567
							0.47424	107.448	0.19114	105.85	2.59711	0.0272
							0.4891	108.379	0.16827	104.339	2.51279	0.0283
							0.49946	109.041	0.14523	102.675	2.43003	0.02989
							0.52185	110.313	0.1225	100.754	2.34941	0.03509
							0.54457	111.656	0.0995	98.5284	2.27089	0.03613
							0.56758	113.119	0.07708	95.7671	2.19419	0.03773
							0.59075	114.6	0.05422	92.1562	2.11844	0.03897
							0.61356	116.12	0.04996	91.2759	2.04289	0.04109
							0.63664	117.701			1.96872	0.04952
							0.65965	119.26			1.89499	0.05013
							0.68248	120.887			1.82034	0.0498
							0.7057	122.5			1.74596	0.06161
							0.72853	124.081
							0.75166	125.611
							0.77483	126.981
							0.79782	128.177
							0.82098	129.236
							0.84427	130.034
							0.86707	130.74
							0.89018	131.422
							0.91318	132.139
							0.93591	133.103
							0.95884	134.438
							0.98086	136.641
							0.99309	139.254

## Sheet: Fig.4
Fig. 4
HCPOH-C12
-148.446	-40.2789
-148.201	-29.286
-147.956	65.4964
-147.711	87.074
-147.465	84.5392
-147.22	24.2586
-146.975	-8.59129
-146.73	88.2893
-146.485	34.7983
-146.24	22.3752
-145.995	90.5917
-145.75	16.831
-145.505	89.5409
-145.26	73.6198
-145.014	37.8944
-144.769	197.779
-144.524	204.551
-144.279	77.4967
-144.034	79.7839
-143.789	11.4042
-143.544	-27.0357
-143.299	65.0277
-143.054	-6.49094
-142.809	135.801
-142.563	47.6457
-142.318	74.5867
-142.073	152.211
-141.828	-59.8941
-141.583	50.3606
-141.338	66.5579
-141.093	-7.43266
-140.848	-55.1284
-140.603	-6.85248
-140.358	65.5504
-140.113	68.6537
-139.867	57.7204
-139.622	29.3143
-139.377	-111.941
-139.132	88.3583
-138.887	132.616
-138.642	53.1295
-138.397	106.932
-138.152	-51.2183
-137.907	131.857
-137.662	1.76275
-137.416	81.071
-137.171	165.827
-136.926	32.3964
-136.681	116.766
-136.436	89.6523
-136.191	12.9215
-135.946	60.5803
-135.701	114.559
-135.456	-72.4367
-135.211	9.1601
-134.965	40.4933
-134.72	42.8862
-134.475	22.8382
-134.23	60.0824
-133.985	11.6708
-133.74	171.63
-133.495	179.155
-133.25	-72.2996
-133.005	258.763
-132.76	224.823
-132.514	12.0013
-132.269	66.2648
-132.024	267.623
-131.779	140.273
-131.534	137.976
-131.289	171.901
-131.044	62.3518
-130.799	191.488
-130.554	66.8572
-130.309	79.0579
-130.063	163.427
-129.818	165.581
-129.573	109.58
-129.328	2.37744
-129.083	174.109
-128.838	189.285
-128.593	-100.222
-128.348	164.578
-128.103	30.8609
-127.858	-57.0451
-127.612	96.2711
-127.367	-39.2575
-127.122	150.157
-126.877	100.221
-126.632	70.728
-126.387	-124.383
-126.142	149.377
-125.897	121.345
-125.652	107.712
-125.407	308.377
-125.161	-30.9552
-124.916	130.583
-124.671	-75.7468
-124.426	192.94
-124.181	158.133
-123.936	1.24689
-123.691	290.667
-123.446	-61.6071
-123.201	108.72
-122.956	91.1291
-122.71	113.723
-122.465	235.669
-122.22	-84.1066
-121.975	-104.936
-121.73	54.8529
-121.485	265.285
-121.24	3.22467
-120.995	-172.154
-120.75	4.39339
-120.505	-10.0789
-120.259	99.5311
-120.014	-74.8901
-119.769	-4.73319
-119.524	238.897
-119.279	20.6185
-119.034	180.236
-118.789	189.254
-118.544	-48.6701
-118.299	223.155
-118.054	122.501
-117.808	-200.438
-117.563	-13.0139
-117.318	189.486
-117.073	137.534
-116.828	-3.08147
-116.583	16.4573
-116.338	-3.45326
-116.093	177.099
-115.848	142.122
-115.603	-114.163
-115.357	126.423
-115.112	207.349
-114.867	74.7825
-114.622	100.458
-114.377	72.5305
-114.132	-86.3074
-113.887	84.0412
-113.642	38.9534
-113.397	40.9131
-113.152	0.51352
-112.906	-84.3009
-112.661	246.125
-112.416	52.2241
-112.171	81.9515
-111.926	124.151
-111.681	206.036
-111.436	48.6122
-111.191	53.3999
-110.946	376.405
-110.701	-15.927
-110.455	154.687
-110.21	245.62
-109.965	105.756
-109.72	-70.11
-109.475	13.3971
-109.23	199.032
-108.985	43.2805
-108.74	75.0754
-108.495	-128.277
-108.25	-40.0304
-108.005	241.647
-107.759	233.321
-107.514	89.2761
-107.269	63.205
-107.024	-75.7159
-106.779	18.5944
-106.534	32.594
-106.289	42.8949
-106.044	365.623
-105.799	76.2737
-105.554	-6.14938
-105.308	55.6668
-105.063	-41.5565
-104.818	-2.81731
-104.573	99.9271
-104.328	183.261
-104.083	129.105
-103.838	111.609
-103.593	236.68
-103.348	3.64126
-103.103	-77.6614
-102.857	16.9136
-102.612	-118.748
-102.367	216.045
-102.122	21.9122
-101.877	-15.2578
-101.632	210.512
-101.387	124.991
-101.142	81.6514
-100.897	59.9386
-100.652	96.3267
-100.406	-53.5626
-100.161	130.655
-99.9162	64.2425
-99.6711	114.845
-99.426	127.031
-99.1809	-6.24317
-98.9358	129.557
-98.6907	118.215
-98.4456	134.661
-98.2005	198.512
-97.9554	336.868
-97.7103	47.3266
-97.4652	-150.698
-97.2201	-16.3819
-96.975	166.96
-96.7299	170.256
-96.4848	59.1408
-96.2397	55.896
-95.9946	148.342
-95.7495	247.998
-95.5044	18.3128
-95.2593	107.757
-95.0142	103.417
-94.7691	6.63373
-94.524	136.207
-94.2789	114.082
-94.0338	-29.9949
-93.7887	-14.8703
-93.5437	253.862
-93.2986	165.261
-93.0535	210.13
-92.8084	126.698
-92.5633	-19.0338
-92.3182	107.96
-92.0731	48.8861
-91.828	208.92
-91.5829	97.6372
-91.3378	-105.655
-91.0927	-9.78398
-90.8476	87.3782
-90.6025	48.9173
-90.3574	139.126
-90.1123	121.471
-89.8672	-90.3599
-89.6221	136.833
-89.377	110.697
-89.1319	46.8981
-88.8868	141.49
-88.6417	84.3404
-88.3966	32.8132
-88.1515	104.679
-87.9064	163.683
-87.6613	110.688
-87.4162	65.8959
-87.1711	-28.3604
-86.926	67.1965
-86.6809	60.3444
-86.4358	88.4787
-86.1907	142.634
-85.9456	249.098
-85.7005	213.983
-85.4554	55.2984
-85.2103	206.634
-84.9652	242.835
-84.7201	53.4982
-84.475	-24.3879
-84.2299	167.426
-83.9848	100.068
-83.7397	136.366
-83.4946	60.7137
-83.2495	-36.3373
-83.0044	150.578
-82.7593	112.344
-82.5142	71.4018
-82.2691	-20.8127
-82.024	89.5695
-81.7789	34.2329
-81.5338	-93.2752
-81.2887	83.5491
-81.0436	122.804
-80.7985	79.7529
-80.5534	62.9952
-80.3083	155.254
-80.0632	163.39
-79.8181	15.5889
-79.573	155.638
-79.3279	346.072
-79.0828	294.038
-78.8377	141.785
-78.5926	92.0345
-78.3475	119.352
-78.1024	61.9935
-77.8573	173.351
-77.6122	163.513
-77.3671	206.55
-77.122	197.407
-76.8769	-49.5553
-76.6318	83.9343
-76.3867	194.332
-76.1416	115.383
-75.8965	227.193
-75.6514	246.969
-75.4063	172.411
-75.1612	158.516
-74.9161	58.2662
-74.671	111.033
-74.4259	136.464
-74.1808	232.638
-73.9357	296.608
-73.6906	281.951
-73.4455	345.236
-73.2004	157.493
-72.9553	202.201
-72.7102	204.925
-72.4651	209.814
-72.22	423.801
-71.9749	323.151
-71.7298	297.851
-71.4847	349.319
-71.2396	389.248
-70.9945	407.338
-70.7494	235.855
-70.5043	337.646
-70.2592	382.646
-70.0141	258.299
-69.769	333.368
-69.5239	428.775
-69.2788	473.011
-69.0337	217.122
-68.7886	251.238
-68.5435	431.736
-68.2984	259.554
-68.0533	336.649
-67.8082	325.376
-67.5631	220.614
-67.318	327.218
-67.0729	377.321
-66.8278	321.66
-66.5827	280.917
-66.3376	272.439
-66.0925	367.292
-65.8474	449.807
-65.6023	342.939
-65.3572	234.578
-65.1121	132.225
-64.867	363.386
-64.6219	291.912
-64.3768	199.941
-64.1317	322.495
-63.8866	68.8885
-63.6415	331.969
-63.3964	310.551
-63.1513	416.607
-62.9062	427.731
-62.6612	143.477
-62.4161	521.653
-62.171	581
-61.9259	409.433
-61.6808	163.056
-61.4357	371.666
-61.1906	358.486
-60.9455	183.371
-60.7004	371.688
-60.4553	508.274
-60.2102	486.912
-59.9651	158.287
-59.72	294.921
-59.4749	232.841
-59.2298	279.489
-58.9847	315.249
-58.7396	54.5086
-58.4945	187.219
-58.2494	166.437
-58.0043	160.521
-57.7592	242.411
-57.5141	210.939
-57.269	209.247
-57.0239	209.864
-56.7788	124.598
-56.5337	136.89
-56.2886	144.346
-56.0435	187.944
-55.7984	67.7629
-55.5533	-108.785
-55.3082	151.964
-55.0631	275.263
-54.818	169.101
-54.5729	77.1724
-54.3278	-25.7422
-54.0827	129.333
-53.8376	196.431
-53.5925	49.0501
-53.3474	89.3398
-53.1023	-111.17
-52.8572	-135.681
-52.6121	42.3518
-52.367	57.0189
-52.1219	207.575
-51.8768	29.2497
-51.6317	43.2459
-51.3866	240.364
-51.1415	4.05094
-50.8964	29.063
-50.6513	271.603
-50.4062	184.83
-50.1611	159.194
-49.916	223.039
-49.6709	26.2979
-49.4258	127.189
-49.1807	117.522
-48.9356	-143.668
-48.6905	230.29
-48.4454	214.382
-48.2003	-6.44588
-47.9552	197.8
-47.7101	202.852
-47.465	176.438
-47.2199	48.3655
-46.9748	211.66
-46.7297	143.78
-46.4846	89.0674
-46.2395	361.324
-45.9944	59.8975
-45.7493	138.367
-45.5042	221.24
-45.2591	75.0625
-45.014	213.504
-44.7689	227.574
-44.5238	77.8594
-44.2787	29.2341
-44.0336	139.636
-43.7885	143.783
-43.5434	260.407
-43.2983	90.6501
-43.0532	134.411
-42.8081	246.713
-42.563	51.1787
-42.3179	141.613
-42.0728	-48.0196
-41.8277	38.1407
-41.5826	137.635
-41.3375	62.3695
-41.0924	39.808
-40.8473	-42.6689
-40.6022	84.0528
-40.3571	-1.64262
-40.112	219.94
-39.8669	155.332
-39.6218	57.7342
-39.3767	318.882
-39.1316	46.9429
-38.8865	-117.597
-38.6414	38.0305
-38.3963	210.483
-38.1512	6.46954
-37.9061	175.515
-37.661	400.699
-37.4159	112.957
-37.1708	36.3885
-36.9257	73.7638
-36.6806	18.7662
-36.4355	-135.96
-36.1904	174.153
-35.9453	236.049
-35.7002	212.331
-35.4551	89.1709
-35.21	-4.33365
-34.9649	188.496
-34.7198	33.8624
-34.4747	148.31
-34.2296	-4.92553
-33.9845	190.688
-33.7394	306.578
-33.4943	123.736
-33.2492	108.938
-33.0041	50.0613
-32.759	281.807
-32.5139	219.242
-32.2688	247.753
-32.0237	148.151
-31.7787	103.005
-31.5336	93.2572
-31.2885	-1.18339
-31.0434	86.9418
-30.7983	222.051
-30.5532	295.012
-30.3081	55.1137
-30.063	12.8177
-29.8179	66.0567
-29.5728	83.9892
-29.3277	76.2449
-29.0826	28.5395
-28.8375	60.1833
-28.5924	133.646
-28.3473	81.0903
-28.1022	74.7469
-27.8571	142.361
-27.612	138.701
-27.3669	303.146
-27.1218	193.329
-26.8767	-2.36686
-26.6316	135.52
-26.3865	152.341
-26.1414	167.749
-25.8963	77.7511
-25.6512	176.66
-25.4061	233.741
-25.161	101.833
-24.9159	342.435
-24.6708	-0.80208
-24.4257	-30.3442
-24.1806	215.101
-23.9355	259.719
-23.6904	144.169
-23.4453	-27.3814
-23.2002	231.778
-22.9551	99.323
-22.71	116.499
-22.4649	74.8904
-22.2198	214.572
-21.9747	7.29299
-21.7296	-121.228
-21.4845	213.113
-21.2394	89.8645
-20.9943	92.7072
-20.7492	27.2276
-20.5041	165.834
-20.259	7.81906
-20.0139	134.179
-19.7688	105.944
-19.5237	-118.184
-19.2786	253.45
-19.0335	137.955
-18.7884	89.5153
-18.5433	80.8656
-18.2982	92.9366
-18.0531	174.09
-17.808	49.2368
-17.5629	114.455
-17.3178	121.261
-17.0727	166.353
-16.8276	182.517
-16.5825	149.337
-16.3374	343.386
-16.0923	132.938
-15.8472	47.9085
-15.6021	148.843
-15.357	139.765
-15.1119	189.031
-14.8668	146.84
-14.6217	171.024
-14.3766	201.554
-14.1315	339.256
-13.8864	173.47
-13.6413	188.486
-13.3962	356.128
-13.1511	129.092
-12.906	9.58224
-12.6609	-40.0847
-12.4158	-103.451
-12.1707	122.501
-11.9256	177.438
-11.6805	11.9869
-11.4354	67.6566
-11.1903	125.855
-10.9452	232.111
-10.7001	252.678
-10.455	164.615
-10.2099	-11.8091
-9.96482	188.188
-9.71972	151.966
-9.47462	88.5463
-9.22952	300.064
-8.98442	73.9981
-8.73932	57.1878
-8.49423	95.2963
-8.24913	272.785
-8.00403	206.526
-7.75893	95.5854
-7.51383	199.723
-7.26873	193.668
-7.02363	180.872
-6.77853	136.382
-6.53343	135.905
-6.28833	196.895
-6.04323	341.2
-5.79813	85.0522
-5.55304	-58.6217
-5.30794	180.348
-5.06284	304.973
-4.81774	196.972
-4.57264	245.188
-4.32754	121.797
-4.08244	86.2182
-3.83734	268.356
-3.59224	86.9455
-3.34714	130.885
-3.10204	222.635
-2.85694	117.554
-2.61184	-84.4584
-2.36675	95.1181
-2.12165	201.253
-1.87655	250.13
-1.63145	-17.3455
-1.38635	-155.78
-1.14125	355.814
-0.89615	112.348
-0.65105	299.349
-0.40595	476.425
-0.16085	208.011
0.08425	126.571
0.32935	142.742
0.57444	248.858
0.81954	219.242
1.06464	258.858
1.30974	180.326
1.55484	238.777
1.79994	263.235
2.04504	333.943
2.29014	172.342
2.53524	246.842
2.78034	314.421
3.02544	142.852
3.27054	220.164
3.51564	181.054
3.76073	260.234
4.00583	182.617
4.25093	273.318
4.49603	202.67
4.74113	371.989
4.98623	326.709
5.23133	226.02
5.47643	395.78
5.72153	209.511
5.96663	407.904
6.21173	411.807
6.45683	572.321
6.70193	366.807
6.94702	366.92
7.19212	581.775
7.43722	523.82
7.68232	818.927
7.92742	649.343
8.17252	525.7
8.41762	621.521
8.66272	714.855
8.90782	700.571
9.15292	787.465
9.39802	642.702
9.64312	469.935
9.88821	656.938
10.1333	832.333
10.3784	886.321
10.6235	812.222
10.8686	903.804
11.1137	867.602
11.3588	890.442
11.6039	1046.58
11.849	1001.25
12.0941	1016.02
12.3392	1434.92
12.5843	1417.32
12.8294	1189.06
13.0745	1405.54
13.3196	1473.4
13.5647	1450.43
13.8098	1460.2
14.0549	1508.73
14.3	1525.3
14.5451	1252.18
14.7902	1227.81
15.0353	1399.43
15.2804	1204.7
15.5255	1448.81
15.7706	1448.29
16.0157	1421.82
16.2608	1469.94
16.5059	1795.86
16.751	2799.46
16.9961	2359.3
17.2412	1747.83
17.4863	1726.82
17.7314	1685.79
17.9765	1735.99
18.2216	1653.17
18.4667	1696.04
18.7118	1720.89
18.9569	1826.69
19.202	1932.58
19.4471	1838.58
19.6922	1837.29
19.9373	1881.36
20.1824	1770.42
20.4275	1892.63
20.6726	1756.98
20.9177	1966.55
21.1628	1925.99
21.4079	1480.59
21.653	1906.97
21.8981	1919.51
22.1432	1750.31
22.3883	1850.79
22.6334	1925.31
22.8785	1906.88
23.1236	1861.32
23.3687	1920.71
23.6138	1944.59
23.8589	1855.86
24.104	1951.01
24.3491	2065.56
24.5942	2095.96
24.8393	2292.29
25.0844	2172.83
25.3295	2253.67
25.5746	2250.97
25.8197	2438.6
26.0648	2586.96
26.3099	2466.71
26.555	2776.23
26.8001	2996.88
27.0452	3244.13
27.2903	3317.47
27.5354	3488.19
27.7805	3711.89
28.0256	3831.02
28.2707	3935.46
28.5158	4126.31
28.7609	4251.84
29.006	4294.6
29.2511	4501.76
29.4962	4533.35
29.7413	4565.87
29.9863	4540.85
30.2314	4610.95
30.4765	4623.57
30.7216	4779.56
30.9667	4929.54
31.2118	5155.43
31.4569	5451.67
31.702	5435.53
31.9471	5647.51
32.1922	5546.4
32.4373	5705.91
32.6824	5908.43
32.9275	5942.38
33.1726	6237.58
33.4177	6055.15
33.6628	6305.65
33.9079	6501.36
34.153	6518.31
34.3981	6757.42
34.6432	6757.73
34.8883	7144.97
35.1334	7163.74
35.3785	7290.09
35.6236	7521.37
35.8687	7451.84
36.1138	7586.36
36.3589	7557
36.604	7688.16
36.8491	7607.37
37.0942	7522.37
37.3393	7505.02
37.5844	7266.25
37.8295	7000.29
38.0746	6792.6
38.3197	6476.12
38.5648	6120.67
38.8099	5929.64
39.055	5748.26
39.3001	5596.54
39.5452	5277.38
39.7903	4938.54
40.0354	4740.5
40.2805	4544.83
40.5256	4062.03
40.7707	3834.42
41.0158	3603.13
41.2609	3353.86
41.506	3124.63
41.7511	2714.86
41.9962	2581.66
42.2413	2327.46
42.4864	2077.7
42.7315	1932.79
42.9766	1785.94
43.2217	1563.3
43.4668	1533.04
43.7119	1279.51
43.957	1317.62
44.2021	1363.31
44.4472	1063.62
44.6923	1111.96
44.9374	1054.19
45.1825	1074.18
45.4276	917.109
45.6727	975.271
45.9178	1043.57
46.1629	941.794
46.408	1052.84
46.6531	1083.42
46.8982	814.377
47.1433	1014.75
47.3884	1120.04
47.6335	925.216
47.8786	1117.1
48.1237	942.296
48.3688	1017.07
48.6139	928.812
48.859	889.802
49.1041	1017.16
49.3492	987.677
49.5943	936.975
49.8394	894.094
50.0845	996.247
50.3296	883.737
50.5747	976.329
50.8198	1125.49
51.0649	1092.41
51.31	1060.04
51.5551	919.574
51.8002	935.146
52.0453	952.15
52.2904	802.062
52.5355	1080.24
52.7806	756.364
53.0257	668.319
53.2708	748.005
53.5159	666.079
53.761	741.887
54.0061	505.322
54.2512	677.632
54.4963	547.817
54.7414	740.909
54.9865	519.302
55.2316	508.014
55.4767	692.002
55.7218	431.217
55.9669	590.021
56.212	678.415
56.4571	933.07
56.7022	1243.26
56.9473	1654.94
57.1924	1271.15
57.4375	858.809
57.6826	686.373
57.9277	608.87
58.1728	450.084
58.4179	299.924
58.663	458.788
58.9081	253.121
59.1532	489.253
59.3983	487.715
59.6434	213.658
59.8885	175.959
60.1336	329.445
60.3787	414.83
60.6238	374.574
60.8689	436.508
61.1139	325.832
61.359	403.653
61.6041	386.031
61.8492	167.22
62.0943	345.712
62.3394	302.523
62.5845	317.283
62.8296	386.054
63.0747	168.345
63.3198	435.056
63.5649	377.726
63.81	240.506
64.0551	194.078
64.3002	234.212
64.5453	416.58
64.7904	285.768
65.0355	308.005
65.2806	278.017
65.5257	295.615
65.7708	317.582
66.0159	134.579
66.261	194.327
66.5061	348.332
66.7512	224.24
66.9963	186.472
67.2414	242.022
67.4865	275.915
67.7316	289.787
67.9767	206.355
68.2218	321.241
68.4669	394.847
68.712	323.271
68.9571	369.088
69.2022	197.26
69.4473	227.591
69.6924	340.188
69.9375	482.157
70.1826	474.864
70.4277	333.401
70.6728	527.809
70.9179	324.898
71.163	551.583
71.4081	359.967
71.6532	124.714
71.8983	327.237
72.1434	330.54
72.3885	417.066
72.6336	244.95
72.8787	363.941
73.1238	177.677
73.3689	241.067
73.614	371.624
73.8591	363.301
74.1042	219.089
74.3493	99.535
74.5944	232.356
74.8395	365.276
75.0846	377.951
75.3297	242.046
75.5748	459.85
75.8199	230.658
76.065	335.273
76.3101	168.633
76.5552	137.618
76.8003	460.297
77.0454	321.288
77.2905	281.486
77.5356	306.401
77.7807	406.487
78.0258	233.328
78.2709	396.639
78.516	222.154
78.7611	71.799
79.0062	88.9816
79.2513	90.7508
79.4964	232.835
79.7415	127.568
79.9866	250.682
80.2317	257.594
80.4768	330.898
80.7219	307.989
80.967	102.727
81.2121	195.552
81.4572	296.05
81.7023	201.976
81.9474	157.725
82.1925	193.025
82.4376	239.394
82.6827	114.998
82.9278	74.4865
83.1729	152.25
83.418	237.322
83.6631	239.011
83.9082	222.754
84.1533	170.84
84.3984	145.777
84.6435	433.7
84.8886	207.852
85.1337	142.738
85.3788	152.982
85.6239	190.899
85.869	308.588
86.1141	-15.5977
86.3592	98.047
86.6043	252.699
86.8494	217.328
87.0945	255.539
87.3396	324.764
87.5847	71.6407
87.8298	96.3581
88.0749	333.633
88.32	82.3977
88.5651	-65.6898
88.8102	135.925
89.0553	233.869
89.3004	-1.64087
89.5455	187.812
89.7906	236.71
90.0357	108.693
90.2808	135.475
90.5259	140.551
90.771	151.197
91.0161	-62.8964
91.2612	138.616
91.5063	261.16
91.7514	190.12
91.9964	39.5096
92.2415	32.0211
92.4866	75.4866
92.7317	-22.5064
92.9768	264.768
93.2219	128.055
93.467	227.224
93.7121	268.329
93.9572	123.601
94.2023	68.7813
94.4474	16.4346
94.6925	398.385
94.9376	36.8294
95.1827	-15.1018
95.4278	162.165
95.6729	88.2351
95.918	365.518
96.1631	110.971
96.4082	108.915
96.6533	337.965
96.8984	41.3887
97.1435	18.7033
97.3886	19.8296
97.6337	145.898
97.8788	272.066
98.1239	71.8389
98.369	274.539
98.6141	95.3594
98.8592	-21.823
99.1043	144.586
99.3494	108.072
99.5945	122.384
99.8396	114.299
100.085	-59.3304
100.33	59.365
100.575	324.493
100.82	174.144
101.065	352.556
101.31	75.8341
101.555	328.74
101.8	160.177
102.046	-106.641
102.291	1119.88
102.536	493.427
102.781	177.725
103.026	553.422
103.271	170.547
103.516	514.697
103.761	262.313
104.006	321.205
104.251	369.21
104.497	65.1749
104.742	292.737
104.987	156.575
105.232	271.021
105.477	82.2737
105.722	92.3385
105.967	161.518
106.212	237.759
106.457	341.924
106.702	-0.20235
106.948	391.718
107.193	100.373
107.438	119.585
107.683	295.182
107.928	326.375
108.173	339.967
108.418	18.8551
108.663	326.078
108.908	159.386
109.153	237.437
109.398	328.405
109.644	366.548
109.889	287.322
110.134	244.901
110.379	462.738
110.624	494.336
110.869	443.499
111.114	396.226
111.359	394.594
111.604	132.42
111.849	342.007
112.095	226.258
112.34	264.194
112.585	447.608
112.83	315.799
113.075	269.951
113.32	320.043
113.565	526.097
113.81	340.376
114.055	368.988
114.3	534.712
114.546	499.322
114.791	384.324
115.036	421.897
115.281	507.987
115.526	563.785
115.771	413.338
116.016	518.968
116.261	664.044
116.506	537.701
116.751	683.622
116.997	812.381
117.242	781.803
117.487	603.857
117.732	744.139
117.977	766.329
118.222	790.782
118.467	800.941
118.712	998.288
118.957	993.362
119.202	889.217
119.448	1293.23
119.693	1233.67
119.938	1280.66
120.183	1333.58
120.428	1616.79
120.673	1654.71
120.918	1537.19
121.163	1932.13
121.408	2056.61
121.653	2064.8
121.899	2093.9
122.144	2409.52
122.389	2850.78
122.634	3053.35
122.879	3331.27
123.124	3806.65
123.369	4129.83
123.614	4452.01
123.859	4876.82
124.104	5494.21
124.35	5920.86
124.595	6296.53
124.84	6983.41
125.085	7748.25
125.33	8406.61
125.575	8803.4
125.82	9545.97
126.065	10285.6
126.31	11192.4
126.555	12071
126.801	12853.9
127.046	13655.4
127.291	13989.7
127.536	14615.9
127.781	14922.1
128.026	14978
128.271	15301.3
128.516	15187.9
128.761	14945.2
129.006	14769.1
129.252	14415.2
129.497	14179.1
129.742	13849.7
129.987	13325.4
130.232	12761.5
130.477	12096
130.722	11615.2
130.967	11237.3
131.212	10917.5
131.457	10402.8
131.703	9931.28
131.948	9618.46
132.193	9170.57
132.438	8887.51
132.683	8632.49
132.928	8561.16
133.173	8531.66
133.418	8374.21
133.663	8464.95
133.908	8679.76
134.154	8660.87
134.399	8571.01
134.644	8761.88
134.889	8848.84
135.134	8942.86
135.379	9416.7
135.624	9583.58
135.869	9627.18
136.114	9888.65
136.359	10141
136.605	10308.3
136.85	10219.4
137.095	10432.5
137.34	10463.6
137.585	10339.2
137.83	10242.1
138.075	9908.71
138.32	9595.49
138.565	9205.15
138.81	8817.27
139.055	8283.45
139.301	7823.66
139.546	7238.03
139.791	6894.6
140.036	6286.9
140.281	5774.12
140.526	5450.51
140.771	4771.52
141.016	4356.3
141.261	3786.37
141.506	3543.64
141.752	2908.08
141.997	2557.77
142.242	2441.41
142.487	2058.58
142.732	1903.18
142.977	1731.66
143.222	1548.88
143.467	1259.45
143.712	1295.87
143.957	926.785
144.203	886.795
144.448	1058.5
144.693	809.884
144.938	614.763
145.183	748.043
145.428	810.587
145.673	655.017
145.918	600.867
146.163	691.153
146.408	661.499
146.654	439.579
146.899	679.749
147.144	649.251
147.389	735.049
147.634	632.508
147.879	805.455
148.124	958.857
148.369	840.478
148.614	1078.98
148.859	910.932
149.105	1167.76
149.35	1388.93
149.595	1347.86
149.84	1453.52
150.085	1663.75
150.33	1609.44
150.575	1708.67
150.82	1526.17
151.065	1541.42
151.31	1802.26
151.556	1302.6
151.801	1184.09
152.046	1034.43
152.291	998.058
152.536	986.718
152.781	746.823
153.026	741.465
153.271	770.63
153.516	658.859
153.761	593.769
154.007	402.957
154.252	280.991
154.497	249.913
154.742	303.875
154.987	267.251
155.232	-23.4713
155.477	254.459
155.722	214.499
155.967	79.3224
156.212	183.361
156.458	199.294
156.703	115.747
156.948	64.9635
157.193	139.996
157.438	8.15481
157.683	-10.7127
157.928	33.0612
158.173	23.8929
158.418	1.86945
158.663	-55.2123
158.909	-163.701
159.154	-120.39
159.399	16.7825
159.644	-14.9084
159.889	-6.17049
160.134	53.9181
160.379	-133.657
160.624	22.5477
160.869	-76.0096
161.114	-123.494
161.36	91.9684
161.605	-87.1582
161.85	6.77692
162.095	19.8876
162.34	-81.0857
162.585	-73.3392
162.83	207.153
163.075	45.9036
163.32	-9.18424
163.565	0.9651
163.811	-165.473
164.056	56.339
164.301	-48.2569
164.546	-79.6401
164.791	23.7938
165.036	-93.6748
165.281	-154.106
165.526	-19.8557
165.771	-105.534
166.016	-69.3886
166.262	-95.038
166.507	-3.98372
166.752	44.8652
166.997	-68.2328
167.242	-25.9005
167.487	40.4082
167.732	28.2399
167.977	-8.47924
168.222	59.8284
168.467	-129.27
168.713	-6.18407
168.958	-71.1991
169.203	-18.9555
169.448	-117.32
169.693	-32.2892
169.938	143.884
170.183	-217.266
170.428	-228.41
170.673	-122.022
170.918	99.5267
171.163	37.7741
171.409	14.377
171.654	15.9259
171.899	204.755
172.144	59.6928
172.389	-144.823
172.634	56.6387
172.879	64.3788
173.124	-1.29092
173.369	-17.5114
173.614	64.3661
173.86	74.1388
174.105	83.4615
174.35	-64.433
174.595	-39.2593
174.84	-135.091
175.085	-142.363
175.33	-151.052
175.575	38.7022
175.82	-16.2809
176.065	-233.155
176.311	68.5364
176.556	107.617
176.801	25.2809
177.046	-189.686
177.291	-83.0623
177.536	62.3246
177.781	5.1321
178.026	-154.413
178.271	-22.9072
178.516	79.7979
178.762	81.763
179.007	10.0932
179.252	-107.017
179.497	37.1439
179.742	-239.957
179.987	-35.1538
180.232	18.7604
180.477	-189.865
180.722	-13.4111
180.967	-49.9514
181.213	124.215
181.458	141.961
181.703	-187.651
181.948	-136.913
182.193	74.754
182.438	67.0402
182.683	-31.7997
182.928	90.0149
183.173	-25.4184
183.418	-27.621
183.664	138.324
183.909	-9.95999
184.154	-78.2632
184.399	-119.024
184.644	190.754
184.889	89.8028
185.134	-17.0643
185.379	42.1629
185.624	-23.0904
185.869	83.4919
186.115	10.9799
186.36	-70.2579
186.605	108.161
186.85	108.537
187.095	16.6857
187.34	163.181
187.585	-68.9882
187.83	97.4237
188.075	-31.2028
188.32	-106.849
188.566	101.809
188.811	160.316
189.056	67.8921
189.301	-31.7102
189.546	71.0975
189.791	-100.583
190.036	167.659
190.281	-12.0087
190.526	32.972
190.771	130.632
191.017	59.3713
191.262	43.1243
191.507	44.204
191.752	96.2833
191.997	-216.455
192.242	-133.545
192.487	89.5708
192.732	106.824
192.977	-61.0936
193.222	24.7884
193.468	-53.978
193.713	60.3158
193.958	-86.3994
194.203	-70.4666
194.448	43.8547
194.693	-50.166
194.938	173.679
195.183	92.5016
195.428	135.535
195.673	-120.41
195.919	-36.3976
196.164	78.7795
196.409	126.301
196.654	130.626
196.899	145.738
197.144	142.223
197.389	-73.1633
197.634	55.2644
197.879	65.262
198.124	196.108
198.37	108.955
198.615	-66.9467
198.86	126.799
199.105	183.784
199.35	-43.9033
199.595	101.13
199.84	101.822
200.085	253.735
200.33	155.285
200.575	-105.97
200.82	299.306
201.066	172.289
201.311	80.9097
201.556	-51.7322
201.801	20.9608
202.046	181.507
202.291	-42.3275
202.536	-64.7552
202.781	-83.0618
203.026	-97.8703
203.271	3.83934
203.517	29.595
203.762	58.9794
204.007	164.904
204.252	-14.261
204.497	-103.154
204.742	0.11366
204.987	4.16643
205.232	-57.8593
205.477	-83.1789
205.722	-139.751
205.968	-41.3435
206.213	-34.79
206.458	9.71918
206.703	215.013
206.948	-6.93417
207.193	70.7451
207.438	209.011
207.683	-131.087
207.928	-38.2392
208.173	198.179
208.419	91.6025
208.664	19.5527
208.909	-126.877
209.154	88.5998
209.399	162.158
209.644	-94.1784
209.889	-21.8282
210.134	-140.871
210.379	-63.437
210.624	51.5518
210.87	-49.1889
211.115	23.5254
211.36	1.84108
211.605	-103.065
211.85	-100.53
212.095	86.1852
212.34	24.6462
212.585	-86.3322
212.83	-86.4399
213.075	-154.954
213.321	54.5833
213.566	59.7949
213.811	87.9133
214.056	183.38
214.301	106.056
214.546	160.022
214.791	36.8394
215.036	-102.514
215.281	49.3322
215.526	138.151
215.772	50.8743
216.017	5.87525
216.262	-70.8172
216.507	83.3806
216.752	34.1485
216.997	42.3791
217.242	82.3337
217.487	-109.131
217.732	-7.16875
217.977	-50.5442
218.223	93.9945
218.468	145.148
218.713	34.0537
218.958	45.5275
219.203	65.3581
219.448	117.719
219.693	133.302
219.938	117.254
220.183	26.9709
220.428	60.361
220.674	156.939
220.919	258.161
221.164	194.133
221.409	101.441
221.654	286.985
221.899	446.959
222.144	161.2
222.389	230.358
222.634	376.773
222.879	328.362
223.125	575.703
223.37	604.293
223.615	482.991
223.86	512.038
224.105	705.174
224.35	549.781
224.595	722.832
224.84	902.072
225.085	911.628
225.33	1032.11
225.576	1011.16
225.821	1247.26
226.066	1236.28
226.311	1287.28
226.556	1280.35
226.801	1469.81
227.046	1511.91
227.291	1533.11
227.536	1782.85
227.781	1532.26
228.027	1575.07
228.272	1659.58
228.517	1584.53
228.762	1618.35
229.007	1557.21
229.252	1281.21
229.497	1362.03
229.742	1426.83
229.987	1370.84
230.232	1297.55
230.478	1205.2
230.723	1427.24
230.968	1110.46
231.213	1073.38
231.458	1121.21
231.703	959.728
231.948	1151.1
232.193	1086.59
232.438	1007.55
232.683	950.049
232.928	927.087
233.174	1013.59
233.419	895.233
233.664	1092.38
233.909	1277.71
234.154	1139.93
234.399	1249.67
234.644	1137.71
234.889	1218.49
235.134	1287.26
235.379	1231.35
235.625	1456.1
235.87	1334.38
236.115	1204.35
236.36	1430.13
236.605	1554.83
236.85	1376.25
237.095	1291.08
237.34	1366.04
237.585	1311.39
237.83	1177.19
238.076	1372.59
238.321	1310.73
238.566	1107.43
238.811	1073.07
239.056	893.502
239.301	921.785
239.546	917.884
239.791	680.919
240.036	690.489
240.281	676.418
240.527	477.466
240.772	497.371
241.017	315.764
241.262	553.346
241.507	334.221
241.752	126.548
241.997	472.221
242.242	143.155
242.487	265.756
242.732	409.366
242.978	338.093
243.223	196.41
243.468	107.443
243.713	179.773
243.958	157.117
244.203	21.9891
244.448	205.801
244.693	206.896
244.938	-12.6612
245.183	257.084
245.429	46.4718
245.674	47.0395
245.919	122.145
246.164	116.679
246.409	38.7296
246.654	22.3537
246.899	207.78
247.144	206.378
247.389	215.092
247.634	0.02736
247.88	-89.3487
248.125	28.8589
248.37	183.076
248.615	71.2258
248.86	110.184
249.105	39.5602
249.35	194.319
249.595	167.097
249.84	-29.0716
250.085	99.1579
250.331	11.4129
250.576	53.3852
250.821	-150.942
251.066	244.833
251.311	167.874
251.556	-143.392
251.801	111.276
252.046	100.847
252.291	-71.6249
252.536	-132.154
252.782	66.5478
253.027	-18.2357
253.272	107.515
253.517	80.1548
253.762	91.7441
254.007	-73.5478
254.252	-106.544
254.497	-45.4866
254.742	19.4972
254.987	67.1003
255.233	-127.266
255.478	85.1165
255.723	-108.337
255.968	165.755
256.213	-5.51143
256.458	-45.3786
256.703	201.804
256.948	16.2528
257.193	-22.9268
257.438	-38.0921
257.684	298.431
257.929	-130.984
258.174	76.6095
258.419	96.3266
258.664	-167.295
258.909	-16.3584
259.154	-16.6107
259.399	127.816
259.644	-159.432
259.889	-40.6164
260.135	151.529
260.38	-4.63838
260.625	-48.338
260.87	93.7085
261.115	-108.64
261.36	100.005
261.605	24.2448
261.85	-156.085
262.095	42.9604
262.34	71.4947
262.585	137.114
262.831	-29.6294
263.076	311.996
263.321	-37.013
263.566	-62.2535
263.811	-71.848
264.056	-128.945
264.301	172.398
264.546	-25.756
264.791	46.676
265.036	-121.209
265.282	93.188
265.527	-202.206
265.772	-199.71
266.017	226.526
266.262	102.452
266.507	98.7609
266.752	70.4417
266.997	8.93244
267.242	-29.4799
267.487	121.451
267.733	1.52172
267.978	4.53061
268.223	-30.4913
268.468	17.2157
268.713	97.4188
268.958	-64.8668
269.203	-114.857
269.448	-136.862
269.693	-50.5252
269.938	-9.9856
270.184	27.3503
270.429	19.887
270.674	65.5297
270.919	36.2093
271.164	-49.2756
271.409	42.8879
271.654	72.1751
271.899	70.0192
272.144	17.6057
272.389	-1.72473
272.635	63.1257
272.88	113.082
273.125	120.127
273.37	-152.533
273.615	-112.999
273.86	93.9725
274.105	46.5204
274.35	-23.3278
274.595	-28.9187
274.84	-107.905
275.086	-184.546
275.331	17.8955
275.576	-10.1113
275.821	94.5589
276.066	-39.0867
276.311	-25.5589
276.556	203.22
276.801	-101.114
277.046	13.4092
277.291	232.011
277.537	-32.747
277.782	-116.109
278.027	142.409
278.272	-51.3061
278.517	-36.9441
278.762	-14.1666
279.007	-79.1747
279.252	67.2024
279.497	-60.7322
279.742	-81.9414
279.988	-70.6219
280.233	15.2976
280.478	-199.678
280.723	-77.4975
280.968	82.2666
281.213	-128.129
281.458	100.209
281.703	22.842
281.948	59.7122
282.193	130.329
282.439	42.2384
282.684	96.0502
282.929	-93.6005
283.174	-37.9736
283.419	1.70157
283.664	-5.84589
283.909	157.088
284.154	140.155
284.399	-41.4155
284.644	10.3421
284.89	143.421
285.135	-23.0225
285.38	-151.393
285.625	-211.316
285.87	-143.698
286.115	-52.3934
286.36	32.8073
286.605	20.832
286.85	33.1996
287.095	81.2887
287.341	28.0505
287.586	-54.1275
287.831	-79.0442
288.076	71.5518
288.321	48.2059
288.566	-17.4489
288.811	-145.716
289.056	-86.2761
289.301	77.5575
289.546	21.0322
289.792	-103.597
290.037	-48.7332
290.282	145.465
290.527	-23.242
290.772	-154.375
291.017	-46.4675
291.262	-211.697
291.507	-103.277
291.752	-16.4732
291.997	-118.638
292.243	68.8559
292.488	-34.8273
292.733	191.242
292.978	66.8528
293.223	55.5436
293.468	61.4302
293.713	-97.6719
293.958	13.9983
294.203	-160.742
294.448	213.115
294.693	-88.693
294.939	-120.559
295.184	-14.6284
295.429	-59.3694
295.674	89.3606
295.919	-16.5671
296.164	107.003
296.409	29.4843
296.654	110.1
296.899	-83.2669
297.144	2.61171
297.39	49.5379
297.635	0.79614
297.88	96.7472
298.125	32.9292
298.37	83.025
298.615	-67.4625
298.86	-104.043
299.105	80.8358
299.35	-110.759
299.595	-197.212
299.841	140.342
300.086	10.2042
300.331	54.0862
300.576	97.4956
300.821	164.774
301.066	96.586
301.311	28.2888
301.556	58.7173
301.801	-184.258
302.046	84.0936
302.292	-26.2449
302.537	-60.4576
302.782	75.9169
303.027	-109.871
303.272	-221.273
303.517	-155.841
303.762	51.3966
304.007	-209.752
304.252	-73.1857
304.497	154.685
304.743	70.9339
304.988	74.5006
305.233	-205.346
305.478	71.8672
305.723	108.048
305.968	74.0908
306.213	-37.7298
306.458	-272.692
306.703	82.5468
306.948	-110.474
307.194	47.6374
307.439	-51.232
307.684	-195.399
307.929	9.34042
308.174	-22.0565
308.419	-0.36232
308.664	-76.3505
308.909	158.626
309.154	49.4383
309.399	-68.2107
309.645	-178.755
309.89	-187.361
310.135	34.9589
310.38	-112.969
310.625	-87.5282
310.87	64.7032
311.115	-21.3805
311.36	87.8791
311.605	-0.57326
311.85	-118.614
312.096	99.556
312.341	-41.2726
312.586	-144.837
312.831	-117.435
313.076	30.9334
313.321	88.5533
313.566	13.7761
313.811	99.2864
314.056	2.56036
314.301	-126.281
314.547	-110.17
314.792	17.7229
315.037	218.111
315.282	11.7478
315.527	6.46357
315.772	79.3101
316.017	-157.904
316.262	-93.494
316.507	75.5587
316.752	247.738
316.998	85.444
317.243	126.037
317.488	-41.8857
317.733	-0.23157
317.978	216.711
318.223	96.8345
318.468	-52.3544
318.713	-186.755
318.958	226.792
319.203	57.3941
319.449	8.57049
319.694	-59.3874
319.939	27.0437
320.184	112.892
320.429	-91.3665
320.674	18.6722
320.919	-3.41991
321.164	209.235
321.409	69.8406
321.654	134.735
321.9	27.6942
322.145	-17.3967
322.39	144.146
322.635	9.54855
322.88	-26.6294
323.125	-79.6876
323.37	141.893
323.615	55.1174
323.86	-104.245
324.105	18.3049
324.35	83.1516
324.596	211.571
324.841	160.703
325.086	168.248
325.331	203.745
325.576	4.64464
325.821	322.94
326.066	271.267
326.311	155.052
326.556	219.185
326.801	66.2783
327.047	195.935
327.292	130.236
327.537	281.315
327.782	287.55
328.027	188.868
328.272	250.084
328.517	257.919
328.762	166.426
329.007	265.564
329.252	318.041
329.498	162.374
329.743	174.626
329.988	104.122
330.233	190.689
330.478	113.309
330.723	124.089
330.968	130.287
331.213	118.369
331.458	201.11
331.703	120.898
331.949	192.742
332.194	194.531
332.439	80.923
332.684	120.185
332.929	182.342
333.174	96.3554
333.419	206.344
333.664	144.1
333.909	18.5793
334.154	158.573
334.4	192.374
334.645	283.702
334.89	236.84
335.135	13.9085
335.38	173.26
335.625	368.241
335.87	212.368
336.115	142.007
336.36	392.804
336.605	269.155
336.851	31.9873
337.096	225.109
337.341	135.491
337.586	47.1513
337.831	130.758
338.076	314.746
338.321	118.834
338.566	115.788
338.811	168.475
339.056	-140.513
339.302	115.648
339.547	38.9841
339.792	152.595
340.037	144.753
340.282	82.4581
340.527	100.504
340.772	-75.1077
341.017	100.643
[truncated: 49 more rows]

## Sheet: Fig.6
Fig. 6
fullspectrum			O1S			N1s			Br 3d			C1s
1350	58940.5		Binding Energy (ev)			Binding Energy (ev)			Binding Energy (ev)			Binding Energy (ev)
1349	59348.2		545.5	9205.01		410.5	8913.81		76.5	621.56		298.5	6948.01
1348	58959.6		545.4	9452.75		410.4	8964.52		76.4	601.486		298.4	6891.81
1347	58543		545.3	9497.75		410.3	8989.05		76.3	594.469		298.3	6965.9
1346	58757.3		545.2	9375.08		410.2	8776.99		76.2	613.422		298.2	6718.63
1345	58795.2		545.1	9366.48		410.1	8891.43		76.1	651.098		298.1	6485.45
1344	59140.5		545	9447.03		410	8962.77		76	635.227		298	6147.74
1343	59761.5		544.9	9321.5		409.9	8932.97		75.9	602.957		297.9	6398.02
1342	58918		544.8	9208.53		409.8	9035.57		75.8	605.867		297.8	6687.06
1341	59405.4		544.7	9415.68		409.7	8890.91		75.7	598.635		297.7	6795.91
1340	60610.1		544.6	9279.31		409.6	8933.29		75.6	602.92		297.6	6556.7
1339	60284.3		544.5	9195		409.5	9046.65		75.5	548.353		297.5	6337
1338	59006.7		544.4	9337.28		409.4	8933.23		75.4	546.588		297.4	6304.27
1337	59708.4		544.3	9336.39		409.3	8667.21		75.3	549.353		297.3	6275.42
1336	60742.9		544.2	9321.13		409.2	8669.88		75.2	547.569		297.2	6206.56
1335	58900		544.1	9200.61		409.1	8732.43		75.1	587.304		297.1	6155.08
1334	57937.8		544	9164.22		409	8882.19		75	544.362		297	6081.32
1333	58427.2		543.9	9298.43		408.9	8981.47		74.9	513.865		296.9	5886.14
1332	58696.6		543.8	9272.3		408.8	8958.74		74.8	569.55		296.8	5891.11
1331	58975.5		543.7	9307.29		408.7	8709.33		74.7	557		296.7	5810.57
1330	59684.8		543.6	9178.48		408.6	8689.57		74.6	555.548		296.6	5870.09
1329	59939.3		543.5	9058.81		408.5	8830.87		74.5	528.413		296.5	5811.98
1328	59818.6		543.4	9150.26		408.4	8739.3		74.4	560.656		296.4	5691.85
1327	59731.8		543.3	9017.85		408.3	8594.39		74.3	547.722		296.3	5536.83
1326	59197.6		543.2	9206.78		408.2	8747.26		74.2	539.463		296.2	5560.59
1325	59854.2		543.1	9411.94		408.1	8932.04		74.1	554.351		296.1	5590.49
1324	60183.8		543	9335.13		408	8888.88		74	546.957		296	5463.87
1323	59505.9		542.9	9257.66		407.9	8906.7		73.9	592.296		295.9	5438.11
1322	59427.5		542.8	9167.25		407.8	8831.8		73.8	575.388		295.8	5406.84
1321	59719.8		542.7	9153.96		407.7	8759.92		73.7	559.045		295.7	5421.64
1320	59418.2		542.6	9144.89		407.6	8697.45		73.6	565.055		295.6	5495.18
1319	58395.8		542.5	9049.81		407.5	8802.18		73.5	528.307		295.5	5411.28
1318	58314.3		542.4	9003.13		407.4	8739.51		73.4	487.934		295.4	5331.26
1317	58090.5		542.3	9106.17		407.3	8738.36		73.3	495.779		295.3	5257.11
1316	58117.5		542.2	9145.43		407.2	8849.58		73.2	556.442		295.2	5217.73
1315	58278		542.1	8955.17		407.1	8980.02		73.1	584.144		295.1	5317.06
1314	58248.6		542	9031.93		407	8927.13		73	534.911		295	5350.73
1313	59266.3		541.9	9265.11		406.9	8797.03		72.9	506.212		294.9	5161.72
1312	59946.4		541.8	9119.77		406.8	8895.58		72.8	501.767		294.8	4979.13
1311	59728.4		541.7	8902.34		406.7	8907.59		72.7	492.123		294.7	5025.54
1310	59982.4		541.6	8951.88		406.6	9000.44		72.6	494.973		294.6	5124.04
1309	60471.9		541.5	8912.82		406.5	9063.57		72.5	501.045		294.5	5138.76
1308	59906.7		541.4	8943.15		406.4	8932.59		72.4	475.775		294.4	4870.6
1307	59254.4		541.3	8884.23		406.3	8899.87		72.3	532.008		294.3	4915.02
1306	59339.3		541.2	8951.72		406.2	8930.98		72.2	570.982		294.2	4875.66
1305	59197.1		541.1	9099		406.1	8849.17		72.1	562.723		294.1	4715.09
1304	59271.5		541	9124.21		406	8831.8		72	533.232		294	4866.04
1303	59765		540.9	9014.32		405.9	8806.15		71.9	504.156		293.9	4954.91
1302	59763		540.8	9068.81		405.8	8931.68		71.8	507.284		293.8	4834.65
1301	59966.2		540.7	9028.49		405.7	8985.89		71.7	515.059		293.7	4776.65
1300	59355.9		540.6	8972.62		405.6	8798.72		71.6	537.412		293.6	4707.44
1299	58551		540.5	8941.17		405.5	8796.97		71.5	594.118		293.5	4377.47
1298	59759.8		540.4	8950.35		405.4	8902.91		71.4	554.711		293.4	4732.23
1297	59517.1		540.3	8954.57		405.3	8811.57		71.3	525.747		293.3	4639.71
1296	58454.6		540.2	8979.26		405.2	8785.59		71.2	587.254		293.2	4753.42
1295	58589.2		540.1	9139.1		405.1	8751.46		71.1	599.542		293.1	4743.72
1294	59816.1		540	9048.59		405	8933.47		71	555.755		293	4781.19
1293	60472.9		539.9	9126.25		404.9	9015.9		70.9	577.675		292.9	4667.12
1292	60727.3		539.8	9107.72		404.8	8858.44		70.8	583.704		292.8	4458.03
1291	60798.4		539.7	9133.48		404.7	8654.41		70.7	572.402		292.7	4406.12
1290	60528.2		539.6	9096.62		404.6	8666.65		70.6	603.619		292.6	4666.58
1289	60194.2		539.5	9222.47		404.5	8825.8		70.5	595.825		292.5	4777.88
1288	60125.5		539.4	9238.66		404.4	8941.87		70.4	609.598		292.4	4747.76
1287	60665		539.3	9036.72		404.3	8895.04		70.3	645.873		292.3	4529.69
1286	60714.6		539.2	9061.85		404.2	8884.78		70.2	618.187		292.2	4591.08
1285	61370		539.1	9191.5		404.1	8932.36		70.1	595.021		292.1	4490.39
1284	62034.1		539	9183.84		404	8894.63		70	623.324		292	4418.63
1283	61132.8		538.9	9097.83		403.9	9110.18		69.9	598.959		291.9	4627.2
1282	60288.6		538.8	9181.45		403.8	8943.37		69.8	589.408		291.8	4614.23
1281	60469.7		538.7	9171.72		403.7	8734.18		69.7	616.583		291.7	4566.73
1280	61507		538.6	9116.8		403.6	8836.88		69.6	676.311		291.6	4547.33
1279	62719.2		538.5	9196.62		403.5	9226.73		69.5	678.189		291.5	4488.37
1278	62864.1		538.4	9048.65		403.4	9183.74		69.4	708.175		291.4	4642.74
1277	62338.2		538.3	8911.71		403.3	9258.01		69.3	782.457		291.3	4590.82
1276	62156.1		538.2	9099.33		403.2	9361.35		69.2	835.522		291.2	4496.99
1275	61857.6		538.1	9031.74		403.1	9515.76		69.1	970.976		291.1	4445.28
1274	62491.3		538	9057.81		403	9775.02		69	1051.15		291	4459.33
1273	62224		537.9	9080.11		402.9	10152.8		68.9	1244.5		290.9	4513.06
1272	61873.5		537.8	9161.7		402.8	10442.8		68.8	1630.5		290.8	4449.32
1271	62571.1		537.7	8931.69		402.7	10900.1		68.7	2071.64		290.7	4399.66
1270	62136.3		537.6	8894.09		402.6	11467.1		68.6	2720.03		290.6	4389.18
1269	61542		537.5	9001.19		402.5	12067.5		68.5	3346.83		290.5	4386.3
1268	62104.4		537.4	8976.59		402.4	12659.7		68.4	4142.94		290.4	4477.32
1267	62823.1		537.3	9076.65		402.3	13117.9		68.3	4472.01		290.3	4262.51
1266	63347.3		537.2	9060.54		402.2	13438.8		68.2	4760.04		290.2	4106.67
1265	63318.9		537.1	8826.02		402.1	13834.4		68.1	5048.09		290.1	4091.65
1264	62937.8		537	8713.35		402	13955.9		68	5242.84		290	3988.92
1263	63058.6		536.9	8720.95		401.9	13819.9		67.9	5050.11		289.9	3870.89
1262	63200.6		536.8	8832.45		401.8	13673.5		67.8	5086.19		289.8	3947.95
1261	62925.2		536.7	8985.04		401.7	12982.3		67.7	5019.39		289.7	4110.71
1260	63936.9		536.6	8914.09		401.6	12473.8		67.6	5031.72		289.6	4236.33
1259	64170.8		536.5	8865.02		401.5	11590.8		67.5	5332.26		289.5	4137.33
1258	63958.4		536.4	8841.69		401.4	10957.3		67.4	5773.26		289.4	4114.82
1257	64103.6		536.3	8695.53		401.3	10835.7		67.3	6326.08		289.3	4205.08
1256	63412		536.2	8639.56		401.2	10535.4		67.2	6742.63		289.2	4230.97
1255	63411.2		536.1	8761.69		401.1	9967.44		67.1	6975.41		289.1	4201.86
1254	63874.6		536	8607		401	9721.63		67	6832.72		289	4217.31
1253	64197.4		535.9	8712.87		400.9	9532.58		66.9	6331.92		288.9	4345.95
1252	65445.3		535.8	8813.43		400.8	9463.77		66.8	5633.64		288.8	4455.34
1251	66931.3		535.7	8849.24		400.7	9669.58		66.7	4645.94		288.7	4381.87
1250	66974.4		535.6	8852.59		400.6	9792.04		66.6	3702.36		288.6	4424.59
1249	66082.8		535.5	8935.77		400.5	9879.49		66.5	2888.88		288.5	4357.56
1248	65590.1		535.4	8851.84		400.4	10026.4		66.4	2220.43		288.4	4223.26
1247	66297.8		535.3	9011.92		400.3	10300.5		66.3	1767.44		288.3	4192.4
1246	67494.6		535.2	9046.56		400.2	10374		66.2	1297.76		288.2	4245.09
1245	68012		535.1	8901.94		400.1	10318.9		66.1	1011.9		288.1	4227.14
1244	68735.5		535	8959.44		400	10551.2		66	847.71		288	4073.94
1243	69070		534.9	8731.71		399.9	10856		65.9	801.939		287.9	4259.67
1242	68740.1		534.8	8975.02		399.8	10785.4		65.8	743.978		287.8	4451.17
1241	68571.1		534.7	9195.71		399.7	10879.4		65.7	683.144		287.7	4640.77
1240	68481.3		534.6	9319.85		399.6	11204.9		65.6	617.585		287.6	4835.67
1239	68203.8		534.5	9306.23		399.5	11275.8		65.5	649.136		287.5	5009.11
1238	67413.2		534.4	9713.5		399.4	11420.2		65.4	631.517		287.4	5798.64
1237	66916.2		534.3	10197.8		399.3	11572.8		65.3	572.134		287.3	6206.87
1236	67428.9		534.2	10298		399.2	11700.4		65.2	583.193		287.2	6972.97
1235	68030.5		534.1	10681.8		399.1	11902		65.1	593.389		287.1	7928.41
1234	68774.7		534	11332.3		399	11887.1		65	572.2		287	9098.82
1233	69357.1		533.9	12179.4		398.9	11915.8		64.9	567.397		286.9	10455.4
1232	70574.9		533.8	12665.1		398.8	12007.9		64.8	590.045		286.8	12322.7
1231	72691.7		533.7	13413		398.7	11573.4		64.7	564.834		286.7	14323.1
1230	74243.5		533.6	14378.4		398.6	11265.9		64.6	580.883		286.6	16753.4
1229	75221.6		533.5	15549.1		398.5	10924.3		64.5	589.61		286.5	19683.1
1228	76044.1		533.4	16639.4		398.4	10398.8		64.4	545.831		286.4	22695.6
1227	76591.5		533.3	18388.6		398.3	10156.2		64.3	529.651		286.3	25409
1226	76607.1		533.2	19443.1		398.2	9895.61		64.2	521.766		286.2	28215.1
1225	75436.2		533.1	20424.2		398.1	9685.89		64.1	543.624		286.1	30786.3
1224	74726.3		533	21555.9		398	9483.11		64	511.725		286	33789.7
1223	74351.5		532.9	22440		397.9	9240.57		63.9	486.376		285.9	36789.4
1222	73642.9		532.8	23672.7		397.8	8924.95		63.8	539.389		285.8	39292.8
1221	70774.9		532.7	24435.7		397.7	8990.81		63.7	556.233		285.7	41997.5
1220	66391.4		532.6	24958.4		397.6	9190.33		63.6	558.475		285.6	45062.2
1219	63090.6		532.5	24974		397.5	8942.73		63.5	510.4		285.5	49067.6
1218	59525.6		532.4	24743.8		397.4	8798.92		63.4	522.5		285.4	53204.5
1217	56172.1		532.3	24446.4		397.3	8990.51		63.3	492.488		285.3	57442
1216	52890.4		532.2	23814		397.2	9136.65		63.2	477.948		285.2	62121.1
1215	49855.4		532.1	23095.4		397.1	8899.6		63.1	486.904		285.1	67434.3
1214	47523.8		532	22093		397	8685.1		63	481.191		285	73268.4
1213	46098		531.9	20805.4		396.9	8647.95		62.9	513.814		284.9	76462.4
1212	44913		531.8	19848.3		396.8	8767.97		62.8	550.743		284.8	77436
1211	43394.8		531.7	18376.8		396.7	8728.58		62.7	541.817		284.7	76251.3
1210	42832		531.6	17102.6		396.6	8826.68		62.6	516.242		284.6	73236
1209	42104.9		531.5	16128.4		396.5	8768.42		62.5	552.473		284.5	68284.8
1208	40921.3		531.4	15482.8		396.4	8717.02		62.5			284.4	61444.1
1207	40967.2		531.3	14700.7		396.3	8747.5		62.6			284.3	53952.1
1206	40889.2		531.2	13642.2		396.2	8688.85		62.7			284.2	46119.3
1205	40105		531.1	13050.3		396.1	8850.81		62.8			284.1	38846.1
1204	39968.3		531	12343.3		396	8989.01		62.9			284	32498.6
1203	39371.3		530.9	12028.8		395.9	8886.34		63			283.9	26618.5
1202	38508.7		530.8	11533.4		395.8	8778.08		63.1			283.8	21490.1
1201	39198.4		530.7	10859.9		395.7	8723.97		63.2			283.7	17104.5
1200	40300		530.6	10814.9		395.6	8634.82		63.3			283.6	13959.5
1199	40464.1		530.5	10494.9		395.5	8751.39		63.4			283.5	11236.1
1198	39791.1		530.4	10411.2		395.4	8760.84		63.5			283.4	9097.13
1197	39326.5		530.3	10121.2		395.3	8778.99		63.6			283.3	7326.82
1196	39471.9		530.2	9640.62		395.2	8833.11		63.7			283.2	5940.58
1195	39338.2		530.1	9307.08		395.1	8798.02		63.8			283.1	4878.88
1194	39350.3		530	9084.23		395	8729.4		63.9			283	4373.95
1193	39481.3		529.9	9110.82		394.9	8808.62		64			282.9	3923.44
1192	39464.3		529.8	9241.66		394.8	8816.44		64.1			282.8	3557.52
1191	39786.3		529.7	9049.29		394.7	8675.16		64.2			282.7	3492.52
1190	39901.7		529.6	8704.94		394.6	8587.89		64.3			282.6	3194.52
1189	39900.5		529.5	8655.48		394.5	8644.36		64.4			282.5	2966.13
1188	40542.2		529.4	8792.44		394.4	8765.2		64.5			282.4	3007.13
1187	40968.9		529.3	8762.42		394.3	8760.46		64.6			282.3	2724.12
1186	40366.3		529.2	8706.21		394.2	8923.52		64.7			282.2	2624.66
1185	40397.3		529.1	8896.27		394.1	8913.94		64.8			282.1	2548.23
1184	40494.6		529	8661.36		394	8669.68		64.9			282	2651.78
1183	40266.5		528.9	8550.34		393.9	8746.14		65			281.9	2685.78
1182	40123.1		528.8	8637.58		393.8	8619.55		65.1			281.8	2738.12
1181	40156.3		528.7	8680		393.7	8498.27		65.2			281.7	2859
1180	40397.3		528.6	8817.15		393.6	8673.51		65.3			281.6	2657.84
1179	40709.2		528.5	8595.7		393.5	8807.49		65.4			281.5	2447.01
1178	40882.2		528.4	8520.34		393.4	8843.4		65.5			281.4	2415.27
1177	40990.2		528.3	8382.34		393.3	8918.77		65.6			281.3	2530.6
1176	41472.8		528.2	8563.36		393.2	8757.17		65.7			281.2	2568.43
1175	40962.9		528.1	8706.69		393.1	8618.38		65.8			281.1	2504.14
1174	40425		528	8545.7		393	8677.2		65.9			281	2453.66
1173	40746.7		527.9	8649.7		392.9	8795.38		66			280.9	2357.81
1172	41149.8		527.8	8623.41		392.8	8824.08		66.1			280.8	2358.3
1171	41354.4		527.7	8623.59		392.7	8824.28		66.2			280.7	2450.69
1170	41251.7		527.6	8567.04		392.6	8773.85		66.3			280.6	2329.79
1169	40668.1		527.5	8536.84		392.5	8792.78		66.4			280.5	2364.51
1168	40678.4		527.4	8559.8		409.3			66.5			280.4	2509.87
1167	41192.9		527.3	8405		408.4			66.6			280.3	2465.1
1166	40815.2		527.2	8677.95		394.7			66.7			280.2	2448.91
1165	40369.9		527.1	8728.06		409.9			66.8			280.1	2244.74
1164	40513.9		527	8713.51		409.2			66.9			280	2313.16
1163	41126.1		526.9	8795.83		407.4			67			279.9	2326.89
1162	41234.2		526.8	8666.57		408.5			67.1			279.8	2260.1
1161	40981.4		526.7	8688.32		406.1			67.2			279.7	2311
1160	41094.3		526.6	8870.72		398.3			67.3			279.6	2381.16
1159	42090.6		526.5	8695.22		398.4			67.4			279.5	2472.88
1158	42010.7		526.4	8407.84		393.7			67.5			280.1
1157	40969.9		526.3	8422.96		409			67.6			279.8
1156	41260.2		526.2	8290.62		393.8			67.7			279.7
1155	41804.8		526.1	8309.23		409.4			67.8			280
1154	41935.4		526	8235.26		408.3			67.9			279.9
1153	41639		525.9	8206.38		410			68			280.6
1152	41059.3		525.8	8572.57		406			68.1			280.9
1151	41684.1		525.7	8779.83		406.8			68.2			280.8
1150	42440.8		525.6	8796.33		394.4			68.3			280.5
1149	42260		525.5	8496.94		395.4			68.4			279.6
1148	42068.4		525.5			394.3			68.5			281.4
1147	41274.8		525.6			406.6			68.6			281.5
1146	40555.1		525.7			407.3			68.7			280.2
1145	41480.4		525.8			406.3			68.8			280.7
1144	42037.8		525.9			408			68.9			281
1143	42055.1		526			393.9			69			280.3
1142	42462.7		526.1			399.3			69.1			279.5
1141	42276.9		526.2			395.7			69.2			281.1
1140	42086		526.3			394.6			69.3			280.4
1139	42295.1		526.4			395.6			69.4			281.3
1138	42436.5		526.5			409.1			69.5			282.1
1137	42834.3		526.6			394.8			69.6			281.2
1136	42528.2		526.7			406.7			69.7			282.2
1135	42022.8		526.8			407.5			69.8			282
1134	41368.6		526.9			397.9			69.9			281.6
1133	41962.9		527			409.8			70			281.9
1132	43184.3		527.1			395.3			70.1			282.3
1131	43066.9		527.2			408.7			70.2			281.8
1130	43284		527.3			407.6			70.3			281.7
1129	42940.2		527.4			408.6			70.4			282.5
1128	42748.1		527.5			406.2			70.5			282.4
1127	42896.8		527.6			406.5			70.6			282.6
1126	42714.5		527.7			410.4			70.7			282.7
1125	42947.5		527.8			392.8			70.8			282.8
1124	42922.6		527.9			407.2			70.9			289.9
1123	43476		528			407.7			71			282.9
1122	44075.6		528.1			397.8			71.1			289.8
1121	44403.1		528.2			410.5			71.2			290
1120	43829.6		528.3			410.1			71.3			288
1119	43030.8		528.4			397.5			71.4			290.1
1118	42980.7		528.5			396.1			71.5			290.2
1117	42772		528.6			407.9			71.6			289.7
1116	43231.9		528.7			397.4			71.7			289.4
1115	43722		528.8			405.6			71.8			289.5
1114	43610.8		528.9			395.5			71.9			288.3
1113	43456.7		529			397.1			72			289.1
1112	43607.2		529.1			409.5			72.1			289.3
1111	44254.4		529.2			408.1			72.2			289
1110	44820.1		529.3			397.7			72.3			288.4
1109	45045.6		529.4			408.2			72.4			288.1
1108	44758.3		529.5			410.2			72.5			289.2
1107	44572.4		529.6			410.3			72.6			289.6
1106	44866.1		529.7			398.5			72.7			288.2
1105	44063.8		529.8			406.4			72.8			287.9
1104	43142.8		529.9			394.5			72.9			290.3
1103	43596.7		530			395.2			73			288.9
1102	43881		530.1			397			73.1			288.5
1101	43279.3		530.2			407.8			73.2			283
1100	42546.7		530.3			399.4			73.3			293.5
1099	42094.7		530.4			409.6			73.4			288.7
1098	42218.3		530.5			396.9			73.5			290.5
1097	42351.8		530.6			395.8			73.6			290.6
1096	42738.4		530.7			406.9			73.7			290.7
1095	42128.2		530.8			398.2			73.8			292.7
1094	41405.4		530.9			394			73.9			292
1093	41182.5		531			398.8			74			288.6
1092	41086		531.1			407.1			74.1			291.1
1091	41340.8		531.2			395			74.2			290.8
1090	42235.9		531.3			393.3			74.3			287.8
1089	43125.5		531.4			392.9			74.4			288.8
1088	43311.4		531.5			399			74.5			292.8
1087	42470.4		531.6			398.7			74.6			291
1086	42312.7		531.7			396.2			74.7			290.4
1085	42855.5		531.8			405.9			74.8			291.5
1084	42697.4		531.9			396.7			74.9			292.1
1083	42635.2		532			397.6			75			291.2
1082	42538.2		532.1			395.1			75.1			290.9
1081	42038.2		532.2			396.3			75.2			292.3
1080	41479.5		532.3			392.5			75.3			291.6
1079	42109.5		532.4			408.9			75.4			291.7
1078	42834.2		532.5			409.7			75.5			291.3
1077	42833.3		532.6			408.8			75.6			292.2
1076	42448.8		532.7			405.2			75.7			291.8
1075	42724.2		532.8			396			75.8			291.9
1074	42840.2		532.9			396.8			75.9			293.3
1073	42577.2		533			397.2			76			287.7
1072	43153.7		533.1			394.9			76.1			291.4
1071	43015.8		533.2			398.9			76.2			292.6
1070	42218.9		533.3			396.6			76.3			292.9
1069	41363.4		533.4			393.1			76.4			293.6
1068	41887		533.5			393.6			76.5			294.1
1067	43067.2		533.6			393.4						293.4
1066	42710.7		533.7			398						293.1
1065	42997.9		533.8			398.6						292.4
1064	43135.1		533.9			405.5						293.2
1063	43317.7		534			399.2						293.7
1062	44171.9		534.1			394.2						292.5
1061	44862.6		534.2			393						293
1060	44794		534.3			392.6						293.8
1059	43163.2		534.4			395.9						287.6
1058	42034		534.5			394.1						294
1057	42679.9		534.6			397.3						294.4
1056	43954.7		534.7			407						294.2
1055	43833.3		534.8			392.7						283.1
1054	43559.6		534.9			405.7						294.3
1053	43267.3		535			405.3						293.9
1052	42320.2		535.1			396.4						294.8
1051	43104.4		535.2			398.1						287.5
1050	44029		535.3			393.2						294.7
1049	44088		535.4			393.5						294.6
1048	43841.1		535.5			396.5						294.5
1047	43881.9		535.6			399.1						294.9
1046	44489.3		535.7			405.8						295.2
1045	44471.1		535.8			399.6						295.3
1044	43788.4		535.9			405.4						295.1
1043	43432.8		536			399.5						295.4
1042	44001.6		536.1			405.1						295
1041	44533		536.2			399.7						295.8
1040	44733.9		536.3			399.8						295.5
1039	44780.4		536.4			402.2						295.7
1038	44792.7		536.5			405						295.9
1037	44923.5		536.6			399.9						296
1036	44906.2		536.7			402.1						295.6
1035	45297.3		536.8			402.3						296.3
1034	45666.2		536.9			404.9						296.2
1033	45298.1		537			402						296.1
1032	45058.9		537.1			400						296.4
1031	44436		537.2			402.4						287.4
1030	44145.7		537.3			402.5						296.7
1029	44408		537.4			404.8						296.5
1028	45144.6		537.5			401.9						296.6
1027	46985.7		537.6			402.6						296.9
1026	46621.8		537.7			400.1						296.8
1025	45420		537.8			404.7						283.2
1024	46033		537.9			402.7						297
1023	46601.7		538			402.9						298
1022	47054.5		538.1			402.8						297.1
1021	47026.2		538.2			404.6						297.2
1020	46776.7		538.3			400.2						287.3
1019	46481.4		538.4			401.8						297.3
1018	47153.2		538.5			403						297.4
1017	47231.5		538.6			403.2						297.5
1016	45685		538.7			401.7						297.9
1015	45965.5		538.8			403.1						298.1
1014	46478.2		538.9			403.3						297.6
1013	45939.9		539			400.3						297.8
1012	45772		539.1			404.5						298.2
1011	45555.4		539.2			401.6						297.7
1010	46377.9		539.3			403.4						298.4
1009	47071.3		539.4			404.4						298.5
1008	46134.3		539.5			403.5						298.3
1007	46140.4		539.6			403.6						287.2
1006	46631.7		539.7			400.4						283.3
1005	46353.5		539.8			403.7						287.1
1004	47240.4		539.9			404.3						283.4
1003	48034.8		540			401.5						287
1002	48385.9		540.1			403.8						286.9
1001	48750		540.2			404						283.5
1000	48808.1		540.3			403.9						286.8
999	48091.3		540.4			404.1						283.6
998	48013.3		540.5			404.2						286.7
997	48485.9		540.6			400.5						286.6
996	48221.4		540.7			401.4						283.7
995	47929.3		540.8			400.6						286.5
994	47877.7		540.9			401.3						283.8
993	47417.9		541			400.7						286.4
992	47048		541.1			400.8						286.3
991	46570.3		541.2			401.2						283.9
990	45445.6		541.3			401.1						286.2
989	45541.6		541.4			400.9						286.1
988	46008		541.5			401						284
987	46314.9		541.6									286
986	46068.4		541.7									285.9
985	46263.4		541.8									284.1
984	47211.7		541.9									285.8
983	48095.4		542									285.7
982	48797.2		542.1									285.6
981	49312.1		542.2									284.2
980	50062.9		542.3									285.5
979	51005.7		542.4									285.4
978	51916.7		542.5									284.3
977	51534.1		542.6									285.3
976	51864.2		542.7									284.4
975	52812.5		542.8									285.2
974	52145.6		542.9									285.1
973	50056.9		543									284.5
972	47301		543.1									284.6
971	46608.5		543.2									285
970	46551		543.3									284.7
969	44670.9		543.4									284.9
968	43226.6		543.5									284.8
967	42426.3		543.6
966	41716.2		543.7
965	40812.4		543.8
964	40241.7		543.9
963	40358.7		544
962	39665.3		544.1
961	39270.4		544.2
960	40032.3		544.3
959	40557.8		544.4
958	39938.4		544.5
957	39924.7		544.6
956	39896.3		544.7
955	39997.4		544.8
954	40270.1		544.9
953	40279.7		545
952	40583.7		545.1
951	40800.5		545.2
950	41079.7		545.3
949	40614.5		545.4
948	40341.6		545.5
947	40562.5
946	40793.5
945	40938.4
944	40642
943	39719.7
942	39748.2
941	40227.9
940	40172.7
939	40394.4
938	39935.4
937	39751.4
936	40699.2
935	41300.5
934	41336.2
933	41378
932	41281.5
931	40805.8
930	40169.4
929	40494.2
928	40477
927	39577.6
926	40240.9
925	40413.5
924	40645.2
923	41859.9
922	41865
921	41134.9
920	40954.4
919	41553.3
918	41681.9
917	41124.6
916	41079.7
915	41921
914	41704.9
913	41048.8
912	41720.1
911	41411.3
910	40921.9
909	41331.6
908	41548.8
907	41777.5
906	41610.8
905	41163.3
904	40884.3
903	40937.6
902	41756.2
901	42654.1
900	42797.2
899	43003.6
898	42334.4
897	42369.7
896	43690.4
895	43379.1
894	42819
893	43065.8
892	42808.2
891	41839
890	42003.5
889	42934.8
888	43279.3
887	43243.6
886	43161.1
885	43239.7
884	43496.4
883	44082.5
882	43670.7
881	43220.2
880	43336.3
879	43152.2
878	43391.6
877	43648.6
876	43197.3
875	43112.2
874	43649.4
873	44361.3
872	44327.1
871	43703
870	43164.6
869	42786.5
868	42503.6
867	42780.2
866	43590.7
865	43941.8
864	43947.8
863	44360.5
862	43889.4
861	43111.2
860	43332.6
859	43728.6
858	44438.5
857	44478.3
856	44217.4
855	43685.1
854	43890.2
853	43987.1
852	43488
851	43578.9
850	44379.6
849	44509.5
848	43425.2
847	43595
846	43929.9
845	43391.5
844	43736.2
843	44362.3
842	44442.6
841	44211.3
840	44082.4
839	44717.3
838	44411.2
837	44255.2
836	44815.4
835	44777.8
834	44274.4
833	44516.6
832	45338.1
831	45859.6
830	45844.6
829	45850.7
828	44871.6
827	43970.5
826	44686.9
825	44428.1
824	44337.4
823	45243.7
822	45597.1
821	44834.5
820	44148.1
819	44257.9
818	44770.9
817	45400.9
816	45630.3
815	45250.8
814	44733.8
813	45224.6
812	45157.2
811	45188.4
810	45835.6
809	45632.7
808	45873.5
807	45502.2
806	44905
805	45392.7
804	45412.4
803	45749.8
802	46054.4
801	47028.4
800	47782
799	47257.5
798	46895.5
797	46426.4
796	46070.9
795	45899.7
794	45898.2
793	46136.5
792	46103.6
791	46638.6
790	46682
789	45411.8
788	45326.5
787	46927.2
786	46457.2
785	45423.3
784	46079.7
783	46368.3
782	45448.9
781	45603.2
780	47081.3
779	47540.8
778	47364.6
777	46885.9
776	46107.1
775	45961.2
774	46816.6
773	48005.7
772	47397.9
771	46213.6
770	45922.8
769	47392
768	47710.9
767	47765.2
766	48697.6
765	47455.2
764	46305.6
763	46961.2
762	47604
761	47574.2
760	47999.1
759	47842.2
758	47767.4
757	48499.2
756	49303.6
755	48656.5
754	47117.9
753	47133.2
752	47886.2
751	48123.5
750	48117.2
749	47885.7
748	47973.6
747	48283.2
746	48724
745	48417.4
744	48612.7
743	49311.9
742	48135.7
741	47069.4
740	47888.3
739	48275.7
738	47925
737	48796.4
736	50349.1
735	49735.2
734	48684.7
733	48964.3
732	48884.1
731	48672.5
730	49239.3
729	49496.1
728	49267.4
727	49333.8
726	48415.4
725	48538.8
724	49532.1
723	49074.9
722	49175.7
721	49124.3
720	48295.5
719	49234.4
718	49739.7
717	48900.5
716	49402.9
715	50687.4
714	51693.1
713	51198.7
712	50095.2
711	50011.2
710	50238.1
709	49820.7
708	49606.5
707	50159
706	49849.6
705	49732.8
704	49581
703	50040.4
702	50954.8
701	49896
700	49483.8
699	50075.4
698	49609.1
697	49571.8
696	49770.5
695	49800
694	50375.6
693	50491.6
692	50681
691	50629.4
690	51264.7
689	52685.6
688	52721.9
687	51978.3
686	51461.4
685	51145.9
684	50961.7
683	51351.6
682	51898.1
681	51403.7
680	51034.3
679	51186.8
678	50706.2
677	49965.9
676	50472.2
675	51060.9
674	51685.6
673	51706
672	51166.6
671	51421.3
670	51980.6
669	52576.3
668	52040.2
667	50808.2
666	51403.6
665	52214.6
664	51648.7
663	51192.7
662	51182.5
661	51607.4
660	51691.4
659	51687
658	51579.2
657	50948.2
656	51162.1
655	52225.8
654	51766.1
653	51029
652	51340.9
651	51493.1
650	51686
649	51713.1
648	51655.9
647	51363.2
646	51880.7
645	52654.6
644	52912.1
643	52205.7
642	52384.3
641	52644.3
640	51690.4
639	52365.8
638	52878.6
637	52324.5
636	52239.5
635	51927.5
634	51976.4
633	53066.4
632	53370.3
631	53298.1
630	53623
629	53013.2
628	52153.1
627	52340.3
626	52886
625	52694.9
624	52351.2
623	52392.9
622	52544.6
621	52661.1
620	53441.4
619	54393
618	54745.9
617	54074.9
616	52447.6
615	51762.7
614	52452.3
613	53192.7
612	53820.3
611	54035.3
610	53515.1
609	54179.3
608	54562.3
607	54296.4
606	54273.3
605	53443.7
604	53023.9
603	52447.4
602	52197.6
601	53605
600	54404.6
599	54222
598	54083.8
597	53826.4
596	54773.2
595	54918.9
594	53782.4
593	53142.5
592	53946.9
591	55059.3
590	54811.7
589	54400.3
588	54545.9
587	54900.3
586	54868.7
585	54334.5
584	54510.4
583	54470.4
582	54166.4
581	53991.7
580	54374.1
579	55030.3
578	55319.9
577	55702.9
576	55933.3
575	55672.5
574	55290.6
573	55842.4
572	55694.5
571	55234.9
570	55211.5
569	54538.9
568	54783.7
567	54993.5
566	54319.9
565	54368.7
564	54496.1
563	54540.1
562	55850.2
561	56647.2
560	56712.2
559	56751.6
558	56890.8
557	57615.5
556	56702.5
555	56497.8
554	57100.6
553	56906.2
552	56494.5
551	55662.1
550	54935.4
549	54506.9
548	53966.7
547	53565.8
546	53410.4
545	52711.1
544	51935.8
543	51684.8
542	51786.4
541	51408.9
540	50558.4
539	50794.8
538	51021
537	50921.1
536	50924.5
535	55132.3
534	73051.5
533	99477.5
532	104543
531	83789.8
530	62699.3
529	52019.6
528	48750.3
527	47617.8
526	48220.6
525	48669.7
524	47183.5
523	46869
522	47518.6
521	47978.3
520	47834.4
519	47658.4
518	48667.7
517	49084
516	48378.6
515	47695.6
514	47798.8
513	48408.4
512	48099.6
511	48191
510	48874.1
509	48975.4
508	48983
507	48953.8
506	48855.9
505	49356.5
504	48898.1
503	48007.8
502	48851.8
501	49034.5
500	49262.5
499	48887.2
498	48283.4
497	49735.6
496	50437.9
495	49673
494	49250.7
493	48656.3
492	48989.5
491	49222.7
490	48283.8
489	48965.5
488	49546.5
487	49000.9
486	48837.1
485	49489.7
484	49980.2
483	49358.1
482	48592
481	49198.4
480	50200.9
479	50141.1
478	50308.7
477	50380.8
476	50789.6
475	50420.2
474	49778.8
473	50283.7
472	50525.3
471	50035.4
470	49368.7
469	50046.7
468	50416.3
467	50216.3
466	50453.5
465	50201.9
464	50439.3
463	50509.9
462	50506.9
461	50955.9
460	51020.4
459	50854.1
458	51452.1
457	52191.9
456	51556.2
455	50477.4
454	50521.8
453	51289
452	51607.5
451	52297.6
450	52194.1
449	50982.7
448	51206.4
447	51541.4
446	51202.4
445	50806.3
444	50909.4
443	51802.4
442	51105.5
441	50451.5
440	51041.1
439	51697.4
438	52037.4
437	51994.5
436	51550.7
435	51050.8
434	51337.1
433	51742.5
432	51489.6
431	51446.6
430	51491.9
429	51716.7
428	51955.7
427	51415.3
426	52079.4
425	53507.3
424	54392
423	54997.7
422	54676
421	54233.7
420	53209.3
419	52375.7
418	52292.8
417	52456.3
416	52538
415	51714.9
414	51116.2
413	50663.7
412	50481.6
411	50394.2
410	50512.4
409	51568
408	52279.9
407	51560.4
406	51619.9
405	51842.7
404	52961.7
403	59062.3
402	64650.2
401	63838.5
400	61808.2
399	61095.7
398	58212.2
397	53745.2
396	50396.3
395	49666.3
394	49741
393	49321.4
392	49305.5
391	49683.9
390	50504.3
389	50606.2
388	50674.9
387	50756.3
386	50560.3
385	50100.6
384	50428.5
383	50525.6
382	49185.8
381	49226.4
380	50183.8
379	50720.8
378	51179.6
377	51035.6
376	51116.9
375	51430.2
374	50626.7
373	50229.1
372	51864
371	52960.9
370	52728.7
369	52671.6
368	52208.6
367	51527.5
366	51234.9
365	51269.3
364	51856.5
363	52558.3
362	53008.4
361	52515.9
360	52864.1
359	53517.7
358	52674.3
357	52395.5
356	53102.5
355	53080
354	52454.7
353	52316.9
352	52442.5
351	52988.7
350	53028.7
349	53780.8
348	54503.8
347	53413.9
346	52673.5
345	53249.4
344	54436.1
343	54333.4
342	53359.7
341	53992
340	54215.7
339	54071
338	54556.2
337	55391
336	55143.8
335	54666.5
334	54988.2
333	54818.2
332	54198
331	54556.5
330	55136.6
329	55866.9
328	56413.8
327	55925.2
326	55639.2
325	55104.3
324	54556.8
323	54754
322	54457.8
321	54514.2
320	54541.6
319	54092.3
318	54663.2
317	54856.9
316	55099.8
315	55918.3
314	56712.5
313	57313.7
312	57353
311	57554.4
310	58964.3
309	60039.9
308	59784.3
307	61210.9
306	61851.4
305	60687
304	58693
303	55090.9
302	52595.7
301	50633.1
300	47029.8
299	42377.2
298	38875.2
297	36865.1
296	34411.4
295	31270.6
294	28876.1
293	27977.4
292	27226.1
291	26127.1
290	25078.8
289	26475.3
288	37974.5
287	83894.2
286	182749
285	265460
284	222221
283	102891
282	33470.9
281	18006.2
280	15208
279	13887
278	13902.6
277	13989.3
276	13737.6
275	13827.1
274	13843.5
273	13658.4
272	13705.6
271	13287.7
270	13317.5
269	13710.8
268	13979.1
267	13670.8
266	12710.1
265	12547.6
264	12299
263	11634
262	11904.7
261	12401.6
260	12478.9
259	12916.2
258	12975.3
257	13274.4
256	15600
255	18336.8
254	19184.8
253	17683.2
252	15782.8
251	14449.5
250	13066.2
249	12102.8
248	11922.9
247	12260.5
246	12175.7
245	12070.7
244	12357.6
243	12121
242	12047.1
241	12234.9
240	11762.9
239	11991
238	12285.9
237	11774.4
236	11893.2
235	12236.8
234	11809.8
233	11574
232	12079.9
231	12686.3
230	12617.3
229	11922.1
228	11832.6
227	11813.7
226	11841.5
225	12048.3
224	12045
223	12309.3
222	12345.1
221	12233.6
220	12312.8
219	12523
218	12612.1
217	12196
216	11952.8
215	11810.1
214	12057.2
213	12298.1
212	12210
211	12803.5
210	12823.8
209	12401
208	12675.8
207	12469.4
206	12507.7
205	13092.6
204	13352.7
203	13155.7
202	12909
201	13154.7
200	13293.2
199	12998.9
198	12625.2
197	12350.1
196	12299.1
195	11983.7
194	11032.6
193	10287.5
192	9487.6
191	8956.04
190	9632.19
189	12340.3
188	16056.1
187	17344.2
186	15283.2
185	11987.3
184	10761.4
183	13061.9
182	19177.1
181	25936
180	25933.6
179	18984.5
178	12134.3
177	8539.75
176	7135.96
175	6896.8
174	6812.16
173	6548.81
172	6252.09
171	6137.54
170	6386.86
169	6367
168	6066.35
167	6146.57
166	6040.44
165	5875.55
164	5825.5
163	5741.87
162	5965.39
161	6180.3
160	6034.73
159	5740.4
158	5601.19
157	5338.47
156	5324.8
155	5660.9
154	6162.38
153	6567.93
152	6617.36
151	6446.32
150	6180.42
149	5954.13
148	5991.39
147	5929.84
146	5891.49
145	6041.71
144	6143.96
143	6012.6
142	6013.95
141	6119.51
140	5963.58
139	5743.38
138	5547.93
137	5434.1
136	5368.11
135	5472.04
134	5635.77
133	5696.19
132	5637.68
131	5791.8
130	5836.54
129	5991.36
128	6016.54
127	5696.36
126	5748.84
125	5712.15
124	5641.84
123	5581.34
122	5767.89
121	6277.55
120	6011.17
119	6103.92
118	6320.45
117	6005.12
116	5906.97
115	5890.76
114	5888.61
113	6142.77
112	6477.54
111	6062.29
110	5917.95
109	6068.66
108	5911.8
107	6213.83
106	6315.81
105	6386.73
104	6534.36
103	6782.4
102	7349.39
101	7254.47
100	6691.54
99	6184.17
98	6113.93
97	6315.84
96	6466.32
95	6279.76
94	6207.22
93	6506.42
92	6467.68
91	6526.77
90	6766.18
89	6939.28
88	7035.16
87	6971.22
86	6783.05
85	6616.34
84	6867.41
83	7152.78
82	7037.5
81	6508.33
80	5764.1
79	5146.19
78	4764.02
77	4386.99
76	3917.04
75	3501.09
74	3402.97
73	3406.06
72	3488.09
71	3709.52
70	5235.19
69	11451.8
68	21928.3
67	25028.1
66	16159.2
65	7010.74
64	3689.67
63	3148.2
62	3133.17
61	2923.41
60	2982.63
59	3363.78
58	3301.74
57	3155.71
56	3337.79
55	3370.89
54	3287.44
53	3211.41
52	3113.72
51	3093.89
50	3276.36
49	3346.82
48	3305.7
47	3202.55
46	3144.6
45	3292.24
44	3309.33
43	3175.43
42	3160.69
41	3440.99
40	3524.5
39	3211.34
38	3234.76
37	3077.09
36	2872.56
35	3184.68
34	3433.59
33	3446.09
32	3148.06
31	2711.59
30	2659.21
29	3186.16
28	3782.97
27	3852.96
26	3959.34
25	4028.49
24	3686.92
23	3155.78
22	3040.35
21	3385.11
20	3993.09
19	4706.8
18	5139.18
17	5222.44
16	5075.14
15	4836.7
14	4926.45
13	4332.72
12	2925.25
11	1969.31
10	1551.89
9	1392.96
8	1446.31
7	1312.1
6	1105.05
5	1206.34
4	2505.73
3	4302.08
2	3707.12
1	1491.89
0	279.823
-1	59.6151
-2	41.1358
-3	44.2444
-4	33.4259
-5	12.6475
-6	10.2744
-7	2.91383
-8	0
-9	9.29299
-10	19.7723

## Sheet: Fig.7a
Fig. 7a
Temp.
32	0
32	2.71898e-06
32	9.87591e-06
32	2.14708e-05
32	3.75036e-05
32	5.79744e-05
32	8.28832e-05
32	0.00011223
32	0.000146015
32	0.000184237
32	0.000226898
32	0.000273996
32	0.000325533
33	0.000308524
33	0.000368936
33	0.000433786
33	0.000503074
33	0.000576801
33	0.000654965
33	0.000737567
33	0.000824607
33	0.000916085
33	0.00101
33	0.00111
34	0.00114
34	0.00125
34	0.00137
34	0.00149
34	0.00161
34	0.00173
34	0.00187
34	0.002
34	0.00214
34	0.00229
35	0.00236
35	0.00252
35	0.00267
35	0.00284
35	0.003
35	0.00318
36	0.00328
36	0.00346
36	0.00364
36	0.00383
36	0.00403
36	0.00422
36	0.00443
36	0.00463
36	0.00484
36	0.00506
37	0.00521
37	0.00543
37	0.00566
37	0.00589
37	0.00613
38	0.0063
38	0.00655
38	0.0068
38	0.00706
38	0.00732
39	0.00751
39	0.00778
39	0.00805
39	0.00833
39	0.00861
39	0.0089
39	0.00919
39	0.00948
39	0.00978
40	0.01002
40	0.01032
40	0.01064
40	0.01096
40	0.01128
40	0.0116
41	0.01186
41	0.0122
41	0.01254
41	0.01288
41	0.01323
41	0.01358
41	0.01394
41	0.0143
41	0.01467
41	0.01504
43	0.01527
43	0.01565
43	0.01604
43	0.01642
43	0.01682
44	0.01714
44	0.01755
44	0.01795
44	0.01836
44	0.01878
44	0.0192
44	0.01962
44	0.02005
44	0.02048
44	0.02092
45	0.02129
45	0.02174
45	0.02219
45	0.02264
45	0.0231
46	0.02349
46	0.02396
46	0.02444
46	0.02491
46	0.0254
47	0.02581
47	0.0263
47	0.0268
47	0.0273
47	0.0278
48	0.02824
48	0.02875
48	0.02927
48	0.02979
48	0.03031
49	0.03077
49	0.03131
49	0.03185
49	0.03239
49	0.03294
50	0.03342
50	0.03398
50	0.03454
50	0.03511
50	0.03568
51	0.03618
51	0.03676
51	0.03734
51	0.03793
51	0.03852
51	0.03912
51	0.03972
51	0.04033
51	0.04094
51	0.04156
52	0.0421
52	0.04273
52	0.04335
52	0.04399
52	0.04463
53	0.04519
53	0.04584
53	0.04649
53	0.04715
54	0.04773
54	0.0484
54	0.04906
54	0.04974
54	0.05041
55	0.05102
55	0.05171
55	0.0524
55	0.0531
55	0.05379
55	0.0545
55	0.05521
55	0.05592
55	0.05664
55	0.05736
55	0.05808
55	0.05882
58	0.05933
58	0.06022
58	0.06112
58	0.06202
58	0.06292
59	0.06375
59	0.06466
59	0.06557
59	0.06649
59	0.06741
59	0.06833
60	0.06919
60	0.07011
60	0.07104
60	0.07199
60	0.07294
61	0.07382
61	0.07478
61	0.07574
61	0.0767
61	0.07766
61	0.07863
61	0.07959
61	0.08056
61	0.08154
62	0.08245
62	0.08344
62	0.08443
62	0.08543
62	0.08642
63	0.08735
63	0.08835
63	0.08935
63	0.09035
63	0.09135
64	0.0923
64	0.09332
64	0.09434
64	0.09537
64	0.09639
64	0.09742
65	0.09838
65	0.09943
65	0.10047
65	0.10152
66	0.10249
66	0.10354
66	0.10458
66	0.10563
66	0.10668
67	0.10766
67	0.10873
67	0.10979
67	0.11086
67	0.11193
68	0.11292
68	0.11399
68	0.11507
68	0.11614
68	0.11722
69	0.11822
69	0.11929
69	0.12037
69	0.12144
69	0.12252
70	0.12352
70	0.12459
70	0.12566
70	0.12674
70	0.12781
70	0.12888
70	0.12996
71	0.13095
71	0.13202
71	0.13309
71	0.13416
71	0.13523
72	0.13622
72	0.13729
72	0.13835
72	0.13941
72	0.14047
72	0.14153
73	0.14251
73	0.14357
73	0.14462
73	0.14567
73	0.14672
73	0.14777
73	0.14881
73	0.14985
73	0.15089
74	0.15186
74	0.15289
74	0.15393
74	0.15496
74	0.15598
75	0.15693
75	0.15796
75	0.15897
75	0.15999
75	0.161
75	0.16201
76	0.16294
76	0.16395
76	0.16495
76	0.16594
76	0.16693
77	0.16785
77	0.16883
77	0.16982
77	0.17079
77	0.17177
77	0.17274
77	0.1737
77	0.17467
77	0.17562
77	0.17657
79	0.17738
79	0.17832
79	0.17926
79	0.1802
79	0.18113
79	0.18205
79	0.18297
79	0.18389
79	0.1848
79	0.18571
80	0.18654
80	0.18744
80	0.18833
80	0.18922
80	0.1901
81	0.19091
81	0.19178
81	0.19265
81	0.19352
82	0.19431
82	0.19516
82	0.19601
82	0.19686
82	0.1977
82	0.19854
83	0.1993
83	0.20013
83	0.20095
83	0.20177
83	0.20258
83	0.20339
83	0.20419
83	0.20499
83	0.20579
83	0.20658
84	0.20729
84	0.20807
84	0.20885
84	0.20962
84	0.21039
85	0.21108
85	0.21184
85	0.2126
85	0.21335
85	0.2141
86	0.21477
86	0.21551
86	0.21624
86	0.21697
86	0.2177
87	0.21834
87	0.21906
87	0.21978
87	0.22048
87	0.22119
88	0.22182
88	0.22251
88	0.2232
88	0.22389
89	0.22451
89	0.22519
89	0.22586
89	0.22654
89	0.2272
89	0.22787
89	0.22853
89	0.22919
89	0.22984
89	0.23049
90	0.23107
90	0.23171
90	0.23235
90	0.23299
90	0.23362
91	0.23418
91	0.2348
91	0.23542
91	0.23604
91	0.23666
92	0.2372
92	0.2378
92	0.23841
92	0.23901
92	0.23961
92	0.2402
93	0.24072
93	0.2413
93	0.24189
93	0.24246
93	0.24304
93	0.24361
94	0.24411
94	0.24467
94	0.24523
94	0.24579
94	0.24635
95	0.24682
95	0.24737
95	0.24791
95	0.24845
95	0.24899
95	0.24952
95	0.25005
95	0.25057
95	0.2511
95	0.25161
95	0.25212
97	0.25249
97	0.25299
97	0.25349
97	0.25399
97	0.25448
97	0.25497
97	0.25545
97	0.25593
97	0.2564
99	0.25673
99	0.25719
99	0.25765
99	0.25811
99	0.25856
100	0.25893
100	0.25937
100	0.25981
100	0.26024
100	0.26067
100	0.26109
101	0.26143
101	0.26184
101	0.26225
101	0.26265
101	0.26305
101	0.26344
101	0.26383
101	0.26421
101	0.26458
101	0.26495
102	0.26524
102	0.2656
102	0.26595
102	0.2663
103	0.26657
103	0.2669
103	0.26723
103	0.26756
103	0.26788
104	0.26811
104	0.26842
104	0.26872
104	0.26901
104	0.2693
105	0.26951
105	0.26979
105	0.27005
105	0.27032
105	0.27057
105	0.27082
105	0.27106
105	0.2713
105	0.27153
105	0.27175
106	0.2719
106	0.2721
106	0.27231
106	0.2725
106	0.27269
107	0.2728
107	0.27297
107	0.27313
107	0.27329
107	0.27344
108	0.27351
108	0.27365
108	0.27377
108	0.27389
108	0.274
109	0.27403
109	0.27413
109	0.27421
109	0.27429
109	0.27436
109	0.27442
109	0.27448
109	0.27452
109	0.27455
110	0.27451
110	0.27453
110	0.27454
110	0.27454
110	0.27453
111	0.27444
111	0.27441
111	0.27437
111	0.27433
111	0.27427
111	0.27421
111	0.27413
112	0.27398
112	0.27389
112	0.27378
112	0.27367
112	0.27355
113	0.27335
113	0.27321
113	0.27306
113	0.2729
114	0.27265
114	0.27247
114	0.27228
114	0.27208
114	0.27187
115	0.27157
115	0.27134
115	0.2711
115	0.27085
115	0.27059
116	0.27024
116	0.26996
116	0.26967
116	0.26937
116	0.26906
116	0.26873
116	0.2684
116	0.26806
116	0.2677
116	0.26734
117	0.26689
117	0.2665
117	0.26611
117	0.2657
117	0.26529
118	0.26479
118	0.26435
118	0.2639
118	0.26344
118	0.26298
119	0.26242
119	0.26194
119	0.26144
119	0.26093
119	0.26041
119	0.25988
119	0.25933
119	0.25878
119	0.25822
119	0.25765
120	0.257
120	0.25641
120	0.2558
120	0.25519
120	0.25457
121	0.25387
121	0.25323
121	0.25258
121	0.25191
122	0.25117
122	0.25049
122	0.2498
122	0.2491
122	0.24839
122	0.24768
123	0.24688
123	0.24614
123	0.24539
123	0.24464
123	0.24388
123	0.2431
124	0.24225
124	0.24146
124	0.24066
124	0.23985
124	0.23903
124	0.23821
124	0.23738
124	0.23653
124	0.23568
125	0.23475
125	0.23388
125	0.23301
125	0.23213
125	0.23124
125	0.23034
125	0.22943
125	0.22852
125	0.2276
125	0.22667
126	0.22566
126	0.22472
126	0.22377
126	0.22282
126	0.22185
127	0.22081
127	0.21983
127	0.21885
127	0.21786
127	0.21687
128	0.21579
128	0.21479
128	0.21377
128	0.21275
128	0.21173
128	0.2107
128	0.20967
128	0.20863
128	0.20758
128	0.20653
130	0.20533
130	0.20427
130	0.20321
130	0.20214
130	0.20107
130	0.19999
130	0.19891
130	0.19783
130	0.19674
130	0.19565
131	0.19448
131	0.19339
131	0.19229
131	0.19118
131	0.19008
132	0.1889
132	0.18779
132	0.18667
132	0.18556
132	0.18444
133	0.18325
133	0.18213
133	0.18101
133	0.17988
133	0.17876
134	0.17756
134	0.17643
134	0.1753
134	0.17417
134	0.17304
135	0.17184
135	0.17071
135	0.16958
135	0.16845
135	0.16732
136	0.16612
136	0.16499
136	0.16386
136	0.16273
136	0.1616
136	0.16048
136	0.15935
136	0.15823
136	0.15711
136	0.15599
137	0.1548
137	0.15368
137	0.15256
137	0.15145
138	0.15027
138	0.14916
138	0.14806
138	0.14695
138	0.14585
139	0.14469
139	0.14359
139	0.1425
139	0.14141
139	0.14033
140	0.13918
140	0.1381
140	0.13703
140	0.13596
140	0.1349
140	0.13384
140	0.13278
140	0.13173
140	0.13068
140	0.12964
140	0.1286
140	0.12757
140	0.12654
140	0.12551
140	0.1245
140	0.12348
142	0.12233
142	0.12132
142	0.12033
142	0.11934
142	0.11835
142	0.11737
143	0.11632
143	0.11535
143	0.11439
143	0.11343
143	0.11248
143	0.11153
145	0.11045
145	0.10951
145	0.10859
145	0.10767
145	0.10675
146	0.10577
146	0.10487
146	0.10397
146	0.10308
146	0.1022
146	0.10132
146	0.10045
146	0.09959
146	0.09873
146	0.09788
147	0.09696
147	0.09613
147	0.09529
147	0.09447
147	0.09365
148	0.09277
148	0.09196
148	0.09116
148	0.09037
149	0.08951
149	0.08873
149	0.08795
149	0.08718
149	0.08642
149	0.08567
150	0.08484
150	0.0841
150	0.08336
150	0.08263
150	0.08191
150	0.08119
150	0.08048
150	0.07977
150	0.07907
150	0.07838
151	0.07762
151	0.07693
151	0.07626
151	0.07558
151	0.07492
152	0.07419
152	0.07353
152	0.07288
152	0.07224
152	0.07161
152	0.07098
152	0.07035
152	0.06973
152	0.06912
152	0.06851
154	0.06776
154	0.06716
154	0.06657
154	0.06598
154	0.0654
154	0.06482
155	0.06418
155	0.06361
155	0.06305
155	0.0625
155	0.06195
155	0.0614
155	0.06086
155	0.06032
155	0.05979
155	0.05926
155	0.05874
156	0.05815
156	0.05764
156	0.05713
156	0.05663
156	0.05613
157	0.05556
157	0.05507
157	0.05459
157	0.0541
157	0.05363
158	0.05308
158	0.05261
158	0.05215
158	0.05169
159	0.05116
159	0.0507
159	0.05025
159	0.04981
159	0.04937
160	0.04885
160	0.04842
160	0.04799
160	0.04756
160	0.04713
161	0.04664
161	0.04622
161	0.0458
161	0.04539
161	0.04498
161	0.04457
161	0.04417
161	0.04377
161	0.04337
161	0.04297
162	0.04251
162	0.04212
162	0.04173
162	0.04134
162	0.04096
163	0.04051
163	0.04013
163	0.03975
163	0.03938
163	0.03901
164	0.03857
164	0.0382
164	0.03784
164	0.03747
164	0.03711
164	0.03676
165	0.03633
165	0.03597
165	0.03562
165	0.03527
165	0.03492
166	0.0345
166	0.03416
166	0.03381
166	0.03347
167	0.03306
167	0.03272
167	0.03238
167	0.03205
167	0.03172
167	0.03139
167	0.03105
167	0.03073
167	0.0304
167	0.03007
168	0.02968
168	0.02935
168	0.02903
168	0.02871
168	0.0284
169	0.02801
169	0.02769
169	0.02738
169	0.02706
169	0.02675
170	0.02637
170	0.02606
170	0.02576
170	0.02545
170	0.02515
171	0.02477
171	0.02447
171	0.02417
171	0.02387
171	0.02357
172	0.0232
172	0.02291
172	0.02261
172	0.02232
172	0.02203
173	0.02167
173	0.02138
173	0.02109
173	0.0208
173	0.02052
174	0.02016
174	0.01988
174	0.0196
174	0.01932
174	0.01905
174	0.01877
174	0.0185
174	0.01822
174	0.01795
174	0.01768
174	0.01742
175	0.01708
175	0.01681
175	0.01655
175	0.01629
175	0.01603
176	0.0157
176	0.01545
176	0.0152
176	0.01495
176	0.0147
177	0.01438
177	0.01413
177	0.01389
177	0.01365
177	0.01341
178	0.0131
178	0.01287
178	0.01263
178	0.0124
178	0.01218
178	0.01195
178	0.01173
178	0.01151
178	0.01129
178	0.01107
179	0.01078
179	0.01057
179	0.01036
179	0.01016
179	0.00995
179	0.00975
180	0.00948
180	0.00928
180	0.00909
180	0.0089
180	0.00871
181	0.00845
181	0.00826
181	0.00808
181	0.00791
181	0.00773
182	0.00748
182	0.00731
182	0.00715
182	0.00698
183	0.00675
183	0.00659
183	0.00643
183	0.00627
183	0.00612
183	0.00597
183	0.00583
183	0.00568
183	0.00554
183	0.00541
183	0.00527
184	0.00507
184	0.00494
184	0.00481
184	0.00469
184	0.00456
185	0.00437
185	0.00426
185	0.00414
185	0.00403
185	0.00392
186	0.00375
186	0.00364
186	0.00354
186	0.00345
186	0.00335
187	0.00319
187	0.0031
187	0.00302
187	0.00293
187	0.00285
187	0.00278
187	0.0027
187	0.00263
187	0.00256
187	0.00249
188	0.00236
188	0.0023
188	0.00224
188	0.00219
188	0.00214
189	0.00201
189	0.00197
189	0.00193
189	0.00189
189	0.00185
190	0.00174
190	0.00171
190	0.00168
190	0.00166
190	0.00163
191	0.00154
191	0.00152
191	0.00151
191	0.0015
191	0.00149
191	0.00148
191	0.00148
191	0.00148
191	0.00148
192	0.00147
192	0.00148
192	0.00149
192	0.0015
192	0.00152
193	0.00153
193	0.00155
193	0.00158
193	0.0016
193	0.00163
193	0.00166
194	0.00169
194	0.00172
194	0.00176
194	0.0018
194	0.00184
195	0.00188
195	0.00193
195	0.00198
195	0.00203
195	0.00208
196	0.00213
196	0.00219
196	0.00224
196	0.0023
196	0.00237
197	0.00243
197	0.00249
197	0.00256
197	0.00263
197	0.0027
197	0.00277
197	0.00285
197	0.00292
197	0.003
197	0.00307
198	0.00315
198	0.00323
198	0.00332
198	0.0034
198	0.00348
199	0.00357
199	0.00365
199	0.00374
199	0.00383
199	0.00392
200	0.00401
200	0.0041
200	0.00419
200	0.00428
200	0.00437
201	0.00446
201	0.00456
201	0.00465
201	0.00474
201	0.00484
201	0.00493
201	0.00503
201	0.00512
201	0.00522
202	0.00531
202	0.00541
202	0.0055
202	0.0056
202	0.00569
203	0.00579
203	0.00588
203	0.00598
203	0.00607
203	0.00617
203	0.00627
203	0.00636
203	0.00645
203	0.00655
203	0.00664
203	0.00674
203	0.00683
204	0.00692
204	0.00701
204	0.00711
204	0.0072
204	0.00729
204	0.00738
204	0.00747
204	0.00756
205	0.00764
205	0.00773
205	0.00782
205	0.0079
205	0.00799
205	0.00807
205	0.00815
205	0.00824
205	0.00832
205	0.0084
207	0.00848
207	0.00856
207	0.00863
207	0.00871
207	0.00878
208	0.00886
208	0.00893
208	0.009
208	0.00907
208	0.00914
208	0.00921
208	0.00928
208	0.00934
208	0.00941
208	0.00947
209	0.00953
209	0.00959
209	0.00965
209	0.00971
209	0.00977
210	0.00982
210	0.00988
210	0.00993
210	0.00998
210	0.01003
211	0.01008
211	0.01013
211	0.01017
211	0.01022
211	0.01026
212	0.0103
212	0.01035
212	0.01038
212	0.01042
212	0.01046
213	0.01049
213	0.01053
213	0.01056
213	0.01059
213	0.01062
214	0.01065
214	0.01068
214	0.01071
214	0.01073
214	0.01076
215	0.01078
215	0.01081
215	0.01083
215	0.01085
215	0.01087
215	0.01089
215	0.0109
215	0.01092
215	0.01093
215	0.01095
216	0.01096
216	0.01097
216	0.01099
216	0.011
216	0.011
217	0.01101
217	0.01102
217	0.01103
217	0.01103
218	0.01104
218	0.01104
218	0.01104
218	0.01105
218	0.01105
219	0.01105
219	0.01105
219	0.01105
219	0.01104
219	0.01104
219	0.01104
219	0.01103
219	0.01103
219	0.01102
219	0.01102
219	0.01101
219	0.011
222	0.01099
222	0.01098
222	0.01097
222	0.01096
222	0.01095
223	0.01094
223	0.01093
223	0.01092
223	0.01091
223	0.0109
223	0.01088
224	0.01087
224	0.01086
224	0.01084
224	0.01083
224	0.01081
225	0.0108
225	0.01079
225	0.01077
225	0.01076
225	0.01074
225	0.01073
225	0.01072
225	0.0107
225	0.01069
226	0.01067
226	0.01066
226	0.01064
226	0.01063
226	0.01062
227	0.01061
227	0.01059
227	0.01058
227	0.01057
227	0.01056
228	0.01055
228	0.01054
228	0.01053
228	0.01052
228	0.01051
228	0.0105
229	0.01049
229	0.01048
229	0.01047
229	0.01047
230	0.01046
230	0.01046
230	0.01045
230	0.01045
230	0.01044
231	0.01044
231	0.01044
231	0.01043
231	0.01043
231	0.01043
232	0.01043
232	0.01043
232	0.01044
232	0.01044
232	0.01044
233	0.01045
233	0.01045
233	0.01045
233	0.01046
233	0.01047
234	0.01047
234	0.01048
234	0.01049
234	0.0105
234	0.01051
234	0.01052
234	0.01053
235	0.01054
235	0.01055
235	0.01056
235	0.01057
235	0.01058
236	0.0106
236	0.01061
236	0.01063
236	0.01064
236	0.01066
236	0.01067
237	0.01069
237	0.0107
237	0.01072
237	0.01074
237	0.01076
237	0.01078
237	0.01079
237	0.01081
237	0.01083
238	0.01085
238	0.01087
238	0.01089
238	0.01092
238	0.01094
239	0.01096
239	0.01098
239	0.011
239	0.01102
239	0.01105
239	0.01107
240	0.01109
240	0.01112
240	0.01114
240	0.01116
240	0.01119
241	0.01121
241	0.01124
241	0.01126
241	0.01129
241	0.01131
241	0.01134
241	0.01136
241	0.01139
241	0.01141
241	0.01144
243	0.01146
243	0.01149
243	0.01151
243	0.01154
243	0.01156
243	0.01159
243	0.01161
243	0.01163
243	0.01166
243	0.01168
244	0.01171
244	0.01173
244	0.01176
244	0.01178
244	0.0118
245	0.01183
245	0.01185
245	0.01187
245	0.0119
246	0.01192
246	0.01194
246	0.01196
246	0.01198
246	0.012
246	0.01202
247	0.01204
247	0.01206
247	0.01208
247	0.0121
247	0.01211
247	0.01213
247	0.01215
247	0.01216
247	0.01218
247	0.01219
248	0.01221
248	0.01222
248	0.01223
248	0.01224
248	0.01225
249	0.01227
249	0.01227
249	0.01228
249	0.01229
249	0.0123
250	0.01231
250	0.01231
250	0.01232
250	0.01232
250	0.01233
251	0.01233
251	0.01234
251	0.01234
251	0.01234
251	0.01234
252	0.01234
252	0.01234
252	0.01234
252	0.01234
253	0.01233
253	0.01233
253	0.01232
253	0.01232
253	0.01231
253	0.01231
253	0.0123
253	0.01229
253	0.01228
253	0.01227
254	0.01225
254	0.01224
254	0.01223
254	0.01221
254	0.0122
255	0.01218
255	0.01216
255	0.01214
255	0.01212
255	0.0121
256	0.01208
256	0.01206
256	0.01203
256	0.01201
256	0.01198
256	0.01196
257	0.01193
257	0.0119
257	0.01187
257	0.01184
257	0.01181
257	0.01178
258	0.01175
258	0.01171
258	0.01168
258	0.01164
258	0.01161
259	0.01157
259	0.01153
259	0.01149
259	0.01145
259	0.01141
259	0.01137
259	0.01133
259	0.01128
259	0.01124
259	0.0112
259	0.01115
261	0.01111
261	0.01106
261	0.01101
261	0.01096
261	0.01092
261	0.01087
261	0.01082
261	0.01077
261	0.01072
263	0.01066
263	0.01061
263	0.01056
263	0.01051
263	0.01045
264	0.0104
264	0.01034
264	0.01029
264	0.01023
264	0.01018
264	0.01012
265	0.01006
265	0.01
265	0.00994
265	0.00988
265	0.00983
265	0.00977
265	0.0097
265	0.00964
265	0.00958
265	0.00952
266	0.00946
266	0.0094
266	0.00934
266	0.00927
267	0.00921
267	0.00915
267	0.00908
267	0.00902
267	0.00896
268	0.00889
268	0.00883
268	0.00877
268	0.0087
268	0.00864
269	0.00857
269	0.00851
269	0.00844
269	0.00838
269	0.00832
269	0.00825
269	0.00819
269	0.00812
269	0.00806
269	0.008
270	0.00793
270	0.00787
270	0.0078
270	0.00774
270	0.00768
271	0.00761
271	0.00755
271	0.00749
271	0.00742
271	0.00736
272	0.0073
272	0.00723
272	0.00717
272	0.00711
272	0.00705
273	0.00698
273	0.00692
273	0.00686
273	0.0068
273	0.00674
273	0.00667
273	0.00661
273	0.00655
273	0.00649
274	0.00643
274	0.00637
274	0.00631
274	0.00625
274	0.00619
275	0.00614
275	0.00608
275	0.00602
275	0.00596
275	0.0059
275	0.00585
275	0.00579
276	0.00573
276	0.00568
276	0.00562
276	0.00557
276	0.00551
277	0.00546
277	0.0054
277	0.00535
277	0.0053
278	0.00524
278	0.00519
278	0.00514
278	0.00509
278	0.00504
279	0.00499
279	0.00494
279	0.00489
279	0.00484
279	0.0048
280	0.00475
280	0.0047
280	0.00465
280	0.00461
280	0.00456
280	0.00452
280	0.00447
280	0.00443
280	0.00438
280	0.00434
281	0.00429
281	0.00425
281	0.00421
281	0.00417
281	0.00412
282	0.00408
282	0.00404
282	0.004
282	0.00396
282	0.00392
283	0.00388
283	0.00384
283	0.0038
283	0.00376
283	0.00372
283	0.00368
283	0.00365
283	0.00361
283	0.00357
283	0.00353
284	0.00349
284	0.00346
284	0.00342
284	0.00338
284	0.00335
285	0.00331
285	0.00328
285	0.00324
285	0.00321
286	0.00317
286	0.00314
286	0.0031
286	0.00307
286	0.00303
286	0.003
287	0.00297
287	0.00293
287	0.0029
287	0.00287
287	0.00284
287	0.0028
288	0.00277
288	0.00274
288	0.00271
288	0.00268
288	0.00264
288	0.00261
288	0.00258
288	0.00255
288	0.00252
289	0.00249
289	0.00246
289	0.00243
289	0.0024
289	0.00237
289	0.00234
289	0.00231
289	0.00228
289	0.00225
289	0.00223
290	0.0022
290	0.00217
290	0.00215
290	0.00212
290	0.00209
291	0.00207
291	0.00204
291	0.00202
291	0.00199
291	0.00197
292	0.00194
292	0.00192
292	0.00189
292	0.00187
292	0.00184
292	0.00182
292	0.00179
292	0.00177
292	0.00175
292	0.00172
294	0.0017
294	0.00168
294	0.00165
294	0.00163
294	0.00161
294	0.00159
294	0.00156
294	0.00154
294	0.00152
294	0.0015
295	0.00147
295	0.00145
295	0.00143
295	0.00141
295	0.00139
296	0.00136
296	0.00134
296	0.00132
296	0.0013
296	0.00128
297	0.00126
297	0.00123
297	0.00121
297	0.00119
297	0.00117
298	0.00115
298	0.00113
298	0.00111
298	0.00109
298	0.00107
299	0.00104
299	0.00102
299	0.001
299	0.000982023
299	0.000961441
300	0.000940858
300	0.000920281
300	0.000900082
300	0.000879904
300	0.00085976
300	0.000839665
300	0.000819639
300	0.000799686
300	0.000779958
300	0.000760326
301	0.000740801
301	0.000721626
301	0.000702569
301	0.000683775
302	0.000665106
302	0.000646569
302	0.000628397
302	0.000610499
302	0.000592732
303	0.000575092
303	0.000557587
303	0.000540226
303	0.000523022
303	0.000506203
304	0.000489548
304	0.000473057
304	0.000456685
304	0.000440561
304	0.000424777
304	0.000409095
304	0.000393508
304	0.000378017
304	0.000362985
304	0.000348031
304	0.000333145
304	0.000318322
304	0.000303562
304	0.00028923
304	0.000274955
304	0.000260734
306	0.000246562
306	0.000232447
306	0.000218755
306	0.000205122
306	0.00019155
306	0.000178028
307	0.000164562
307	0.000151294
307	0.000138087
307	0.000124947
307	0.000111884
307	9.89143e-05
309	8.64158e-05
309	7.4029e-05
309	6.1756e-05
309	4.96022e-05
309	3.75812e-05
310	2.60697e-05
310	1.47058e-05
310	3.49391e-06
310	-7.56317e-06
310	-1.84626e-05
310	-2.89643e-05
310	-3.92895e-05
310	-4.9435e-05
310	-5.93995e-05
310	-6.91719e-05
311	-7.87516e-05
311	-8.79952e-05
311	-9.70393e-05
311	-0.000105868
311	-0.000114475
312	-0.000122619
312	-0.000130384
312	-0.000137902
312	-0.000145165
313	-0.000152169
313	-0.000158679
313	-0.000164784
313	-0.000170628
313	-0.000176203
313	-0.000181276
314	-0.000186071
314	-0.00019045
314	-0.000194557
314	-0.000198397
314	-0.000201974
314	-0.000205056
314	-0.000207872
314	-0.000210431
314	-0.000212738
314	-0.000214799
315	-0.00021656
315	-0.000217775
315	-0.00021876
315	-0.000219526
315	-0.000220069
316	-0.000210184
316	-0.0002103
316	-0.000210081
316	-0.000209672
316	-0.000209076
316	-0.00020806
316	-0.000206849
316	-0.000205315
316	-0.000203608
316	-0.000201726
318	-0.000179244
318	-0.000177008
318	-0.000174465
318	-0.00017176
318	-0.0001689
318	-0.000165659
319	-0.000151911
319	-0.000148233
319	-0.000144414
319	-0.000140455
319	-0.000136123
319	-0.000131646
319	-0.000127028
319	-0.000122269
319	-0.000117374
319	-0.000112115
319	-0.00010672
320	-9.084e-05
320	-8.50462e-05
320	-7.91312e-05
320	-7.3099e-05
320	-6.69566e-05
321	-5.03636e-05
321	-4.38935e-05
321	-3.73426e-05
321	-3.02454e-05
321	-2.30613e-05
322	-5.44757e-06
322	2.01646e-06
322	9.53637e-06
322	5.30618e-06
323	1.132e-05
323	7.14939e-06
323	3.00857e-06
323	-1.10244e-06
323	-5.18367e-06
324	9.79111e-07
324	-3.04253e-06
324	-7.03437e-06
324	-1.09964e-05
324	-1.49287e-05
325	-8.61694e-06
325	-1.24896e-05
325	-1.63325e-05
325	-2.01456e-05
325	-2.39289e-05
325	-2.76824e-05
325	-3.14061e-05
325	-3.51e-05
325	-3.87641e-05
325	-4.23984e-05
326	-3.57887e-05
326	-3.93635e-05
326	-4.29084e-05
326	-4.64236e-05
326	-4.99089e-05
327	-4.31503e-05
327	-4.65761e-05
327	-4.9972e-05
327	-5.33382e-05
327	-5.66746e-05
328	-4.9767e-05
328	-5.30438e-05
328	-5.62908e-05
328	-5.95081e-05
328	-6.26955e-05
328	-6.58531e-05
329	-5.87667e-05
329	-6.18648e-05
329	-6.4933e-05
329	-6.79715e-05
329	-7.09802e-05
330	-6.37448e-05
330	-6.66939e-05
330	-6.96132e-05
330	-7.25027e-05
331	-6.51482e-05
331	-6.79781e-05
331	-7.07782e-05
331	-7.35485e-05
331	-7.6289e-05
331	-7.89998e-05
331	-8.16807e-05
331	-8.43319e-05
331	-8.69532e-05
331	-8.95448e-05
332	-8.18923e-05
332	-8.44243e-05
332	-8.69265e-05
332	-8.93989e-05
332	-9.18415e-05
333	-8.40401e-05
333	-8.64231e-05
333	-8.87763e-05
333	-9.10997e-05
333	-9.33933e-05
334	-8.5443e-05
334	-8.7677e-05
334	-8.98812e-05
334	-9.20557e-05
334	-9.42004e-05
335	-8.6101e-05
335	-8.81861e-05
335	-9.02414e-05
335	-9.22669e-05
335	-9.42626e-05
336	-8.60142e-05
336	-8.79503e-05
336	-8.98567e-05
336	-9.17332e-05
336	-9.35799e-05
337	-8.51826e-05
337	-8.69698e-05
337	-8.87271e-05
337	-9.04547e-05
337	-9.21524e-05
338	-8.36062e-05
338	-8.52444e-05
338	-8.68528e-05
338	-8.84313e-05
338	-8.99801e-05
338	-9.14991e-05
338	-9.29884e-05
338	-9.44478e-05
338	-9.58774e-05
338	-9.72772e-05
338	-9.86473e-05
339	-8.97733e-05
339	-9.10837e-05
339	-9.23644e-05
339	-9.36153e-05
339	-9.48363e-05
340	-8.58134e-05
340	-8.69749e-05
340	-8.81066e-05
340	-8.92085e-05
340	-9.02806e-05
341	-8.11087e-05
341	-8.21212e-05
341	-8.31039e-05
341	-8.40568e-05
341	-8.498e-05
342	-7.56591e-05
342	-7.65226e-05
342	-7.73564e-05
342	-7.81604e-05
342	-7.89345e-05
342	-7.96789e-05
342	-8.03935e-05
342	-8.10783e-05
342	-8.17333e-05
342	-8.23585e-05
343	-7.27397e-05
343	-7.33053e-05
343	-7.38411e-05
343	-7.43472e-05
343	-7.48234e-05
343	-7.52698e-05
344	-6.54723e-05
344	-6.58591e-05
344	-6.62162e-05
344	-6.65435e-05
344	-6.68409e-05
345	-5.68944e-05
345	-5.71323e-05
345	-5.73404e-05
345	-5.75187e-05
345	-5.76672e-05
346	-4.75717e-05
346	-4.76606e-05
346	-4.77198e-05
346	-4.77491e-05
347	-3.75344e-05
347	-3.75042e-05
347	-3.74442e-05
347	-3.73543e-05
347	-3.72347e-05
347	-3.70853e-05
347	-3.69061e-05
347	-3.6697e-05
347	-3.64582e-05
347	-3.61897e-05
347	-3.58913e-05
348	-2.53489e-05
348	-2.49909e-05
348	-2.46031e-05
348	-2.41856e-05
348	-2.37382e-05
349	-1.30469e-05
349	-1.25399e-05
349	-1.20032e-05
349	-1.14366e-05
349	-1.08403e-05
350	0
350	6.55908e-07
350	1.34161e-06

## Sheet: Fig.7b
Fig. 7b
HCPOH-C4		HCPOH-C8		HCPOH-C12
0.00678	0.03484	0.00682	0.04021	0.00683	0.02648
0.01444	0.06892	0.01439	0.07931	0.01435	0.05477
0.02615	0.11743	0.02607	0.13523	0.02616	0.09837
0.03939	0.16811	0.03944	0.19265	0.03932	0.14662
0.06538	0.2588	0.06503	0.30043	0.06508	0.23844
0.09856	0.36251	0.09843	0.42202	0.09847	0.35288
0.12998	0.45258	0.12983	0.52185	0.12909	0.45434
0.19683	0.62578	0.19681	0.70281	0.19596	0.66421
0.26299	0.77898	0.26299	0.85788	0.26289	0.86284
0.32892	0.92028	0.32902	0.99825	0.32887	1.04994
0.3949	1.053	0.39505	1.12796	0.39496	1.22925
0.461	1.17861	0.4612	1.25044	0.46121	1.40259
0.52615	1.29687	0.52645	1.36517	0.52586	1.56549
0.59196	1.41153	0.59229	1.47573	0.59158	1.72588
0.65777	1.52095	0.65818	1.58298	0.6574	1.8822
0.72352	1.62687	0.72411	1.68703	0.72324	2.0339
0.78929	1.72949	0.78993	1.78797	0.78897	2.18128
0.85506	1.82937	0.85577	1.88626	0.85471	2.32488
0.92086	1.92622	0.92155	1.9827	0.92048	2.46519
0.98659	2.02104	0.98655	2.07964	0.98634	2.60282
		1.00022	2.10525	1.00006	2.6356

## Sheet: Fig.8
Fig. 8
HCPOH-C12
min/g	N2	CO2
0	0.0078	0.0042
0.13072	0.00769	0.00444
0.22876	0.00776	0.00467
0.3268	0.00621	0.00379
0.42484	0.00797	0.00381
0.55556	0.00722	0.00393
0.65359	0.00605	0.00323
0.75163	0.00442	0.00239
0.84967	0.00373	0.00175
0.98039	0.00259	0.00131
1.07843	0.00254	0.00103
1.17647	0.00253	0.000833333
1.27451	0.00284	0.000713333
1.40523	0.00322	0.000589333
1.50327	0.00435	0.000546
1.60131	0.00463	0.000478
1.69935	0.00548	0.00043
1.83007	0.00612	0.000417333
1.9281	0.00669	0.000389333
2.02614	0.00854	0.000398667
2.12418	0.01253	0.000408
2.2549	0.02395	0.000376
2.35294	0.05401	0.000392
2.45098	0.1151	0.000364
2.54902	0.21497	0.000366667
2.64706	0.35646	0.000335333
2.77778	0.51973	0.000310667
2.87582	0.66259	0.000294667
2.97386	0.80136	0.000281333
3.0719	0.92925	0.000264667
3.20261	1.02449	0.000233333
3.30065	1.10748	0.000229333
3.39869	1.17415	0.000217333
3.49673	1.21633	0.000192667
3.62745	1.25578	0.000180667
3.72549	1.28027	0.000153333
3.82353	1.30612	0.000157333
3.92157	1.31565	0.000151333
4.05229	1.32925	0.000143333
4.15033	1.33878	0.000136667
4.24837	1.3483	0.000145333
4.34641	1.35646	0.000140667
4.47712	1.35238	0.00013
4.57516	1.36054	0.000145333
4.6732	1.3551	0.000154
4.80392	1.36054	0.000146
4.90196	1.36054	0.000171333
5	1.36054	0.000212667
5.13072	1.36054	0.000242
5.22876	1.35918	0.000344667
5.3268	1.36054	0.000482667
5.42484	1.36054	0.000713333
5.55556	1.36054	0.00112
5.65359	1.36054	0.00171
5.75163	1.35782	0.00256
5.84967	1.36054	0.00381
5.98039	1.35782	0.00564
6.07843	1.36054	0.0084
6.17647	1.36054	0.01307
6.27451	1.36054	0.02033
6.40523	1.35374	0.03173
6.50327	1.35374	0.0484
6.60131	1.34422	0.072
6.73203	1.3415	0.10267
6.83007	1.32517	0.14067
6.9281	1.31429	0.18533
7.02614	1.29796	0.23667
7.12418	1.28844	0.292
7.2549	1.27483	0.35067
7.35294	1.24898	0.41133
7.45098	1.23673	0.47067
7.54902	1.21769	0.526
7.67974	1.20136	0.58067
7.77778	1.18095	0.63
7.87582	1.17415	0.67333
7.97386	1.15102	0.71333
8.10458	1.13333	0.74667
8.20261	1.12109	0.78
8.30065	1.1102	0.80667
8.39869	1.09796	0.82667
8.52941	1.08571	0.84667
8.62745	1.08027	0.86667
8.72549	1.06803	0.88
8.82353	1.06939	0.89333
8.95425	1.05714	0.9
9.05229	1.05714	0.91333
9.15033	1.0517	0.92
9.28105	1.04354	0.92667
9.37908	1.04082	0.93333
9.47712	1.04218	0.94
9.57516	1.03673	0.94
9.70588	1.02721	0.94667
9.80392	1.02857	0.94667
9.90196	1.02449	0.95333
10.0327	1.02449	0.96
10.1307	1.02449	0.96
10.2288	1.01633	0.96
10.3268	1.02041	0.96
10.4575	1.01361	0.96667
10.5556	1.01905	0.96667
10.6536	1.01088	0.96667
10.7516	1.01224	0.96667
10.8824	1.00952	0.96667
10.9804	1.01088	0.97333
11.0784	1.00544	0.97333
11.2091	1.01224	0.97333
11.3072	1.01088	0.97333
11.4052	1.0068	0.97333
11.5033	1.01088	0.98
11.634	1.00816	0.97333
11.732	1.01497	0.98
11.8301	1.0068	0.98
11.9608	1.0068	0.98
12.0588	1.0068	0.98
12.1569	1.01088	0.98
12.2549	1.00816	0.98
12.3856	1.01224	0.98
12.4837	1.00136	0.98667
12.5817	1.00408	0.98667
12.6797	1.00952	0.98
12.8105	1.01088	0.98667
12.9085	1.0068	0.98667
13.0065	1.00952	0.98667
13.1046	1.00952	0.98667
13.2353	1.0068	0.98667
13.3333	1.00544	0.98667
13.4314	1.0068	0.98667
13.5621	1.00544	0.98667
13.6601	1.00272	0.98667
13.7582	1.00544	0.98667
13.8562	1.00272	0.98667
13.9869	1.01224	0.98667
14.085	1.01769	0.98667
14.183	0.99592	0.98667
14.2811	1.00408	0.98667
14.4118	1.01224	0.98667
14.5098	1.0068	0.98667
14.6078	1.01088	0.98667
14.7059	1.0068	0.99333
14.8366	1.01088	0.99333
14.9346	1.0068	0.99333
15.0327	1.00816	0.98667
15.1307	1.00136	0.98667
15.2288	1.0068	0.99333
15.3595	1.0068	0.99333
15.4575	1.00952	0.99333
15.5556	1.00816	0.98667
15.6536	1.00272	0.98667
15.7843	1.00544	0.99333
15.8824	1.00816	0.99333
15.9804	1.00544	0.99333
16.0784	1.01224	0.99333
16.2092	1.00816	0.99333
16.3072	1.00952	0.99333
16.4052	1.00544	0.99333
16.5359	1	0.99333
16.634	1	0.99333
16.732	1.00408	0.99333
16.8301	1.00816	0.99333
16.9608	1.01224	0.99333
17.0588	1.0068	0.98667
17.1569	1.00272	0.98667
17.2876	1.00544	0.99333
17.3856	1.0068	0.99333
17.4837	1.01088	0.99333
17.5817	1.00816	0.99333
17.7124	1.00408	0.99333
17.8105	1.00136	0.99333
17.9085	1.00272	0.99333
18.0392	1.00272	0.99333
18.1373	1.00272	0.99333
18.2353	1.00272	0.99333
18.3333	1.0068	0.99333
18.4641	1.00544	0.99333
18.5621	1.00952	0.99333
18.6601	1.0068	0.99333
18.7582	1.00952	0.99333
18.8889	1.0068	0.99333
18.9869	1.0068	0.99333
19.085	1.00408	0.99333
19.2157	1.0068	0.99333
19.3137	1.00544	0.99333
19.4118	1.00816	0.99333
19.5098	1.00952	0.99333
19.6405	1.00544	0.99333
19.7386	1.00952	0.99333
19.8366	1.00408	0.99333
19.9346	1.0068	0.99333
20.0654	1	0.99333
20.1634	1	1
20.2614	1.00272	1
20.3595	1.00816	0.99333
20.4902	1.0068	0.99333
20.5882	1.00544	0.99333
20.6863	1.00136	1
20.7843	1.00272	1
20.915	1.00816	1
21.0131	1.00408	0.99333
21.1111	1.00408	0.99333
21.2092	1.00408	1
21.3072	1.00544	1
21.4379	1.00544	0.99333
21.5359	1.00816	0.99333
21.634	1.0068	0.99333
21.7647	1.00816	0.99333
21.8627	1.0068	1
21.9608	1.00136	1
22.0915	1.00272	1
22.1895	1.00272	0.99333
22.2876	1.00544	0.99333
22.3856	1.00272	1
22.5163	1.00408	0.99333
22.6144	1.0068	1
22.7124	1.00816	0.99333
22.8105	1.00408	1
22.9412	1.00816	0.99333
23.0392	1.00272	0.99333
23.1373	1.00544	1
23.268	1.00544	0.99333
23.366	1.0068	1
23.4641	1.00816	0.99333
23.5621	1.01224	0.99333
23.6928	1.00272	1
23.7908	1.00408	0.99333
23.8889	1.00408	0.99333
23.9869	1.00544	1
24.1177	1	1
24.2157	1.00136	1
24.3137	1.00272	0.99333
24.4444	1.00136	0.99333
24.5425	1	0.99333
24.6405	1.0068	0.99333
24.7386	1.00544	1
24.8693	1.00136	1
24.9673	1.00136	1
25.0654	0.99592	0.99333
25.1961	0.99864	0.99333
25.2941	1.00136	1
25.3922	1.00272	1
25.4902	1.00408	1
25.6209	1.0068	0.99333
25.7189	1.00544	1
25.817	0.99728	0.99333
25.9477	1.00408	0.99333
26.0458	1	1
26.1438	1.00408	0.99333
26.2418	1.00136	1
26.3726	1	0.99333
26.4706	1.0068	0.99333
26.5686	1.00952	1
26.6667	1.00408	1
26.7974	0.99456	1
26.8954	1	0.99333
26.9935	1.00816	1
27.1242	1.00544	1
27.2222	1.00816	0.99333
27.3203	1.00408	0.99333
27.4183	1.00272	0.99333
27.549	1.00544	0.99333
27.6471	1.00544	1
27.7451	1.00816	0.99333
27.8431	1.00136	0.99333
27.9739	1.00272	1
28.0719	1.00544	0.99333
28.1699	1.00136	1
28.3007	1.00272	1
28.3987	1.00136	1
28.4967	1.00544	0.99333
28.5948	1.00952	1
28.7255	1.00544	0.99333
28.8235	1.00272	0.99333
28.9216	1.00816	0.99333
29.0196	1.00816	1
29.1503	1	0.99333
29.2484	0.99864	0.99333
29.3464	0.99592	1
29.4771	0.99456	0.99333
29.5752	1.0068	0.99333
29.6732	1.00544	0.99333
29.7712	1.00272	0.99333
29.902	1.00544	1
30	1.00136	1
30.098	1.00272	0.99333
30.2288	1.00544	0.99333
30.3268	1	0.99333
30.4248	0.99864	1
30.5229	0.99728	0.99333

## Sheet: Fig.9
Fig. 9
HCPOH-C0	21
HCPOH-C4	14
HCPOH-C8	25
HCPOH-C12	34
HCPOH-C15	28

## Sheet: Fig.10
Fig.10a			Fig.10b			Fig.10c			Fig.10d
Temp.	Yield		Amount	Yield		Time	Yield		Run times
50	18.9		40	80.64		4	34		1	93
60	26		50	83		8	51.4		2	91
70	36		60	85.83		12	67.8		3	88
80	55.8		70	89.33		16	79.3		4	90
90	83		80	92.68		20	87		5	86
						24	93
						28	94

## Sheet: Fig.12
Fig. 12
1/T	ln(K)
0.00309	-5.1328
0.003	-4.18383
0.00291	-3.37115
0.00283	-2.95517
0.00275	-2.19337

## Sheet: Fig.13
Fig. 13
Time(h)	HCPOH-C0	HCPOH-C4	HCPOH-C8	HCPOH-C12	HCPOH-C15
2	1.08766	0.03618	0.07358	0.08418	0.10185
4	1.19481	0.16776	0.16388	0.18519	0.19444
6	1.31818	0.33882	0.27425	0.28283	0.28704
8	1.4026	0.45066	0.39465	0.3771	0.36111
10	1.56494	0.56908	0.46823	0.47138	0.46914
12	1.69481	0.67105	0.55518	0.55892	0.53395
14	1.80519	0.76974	0.65886	0.64646	0.62037
16	1.8961	0.87171	0.68896	0.71717	0.6821
18	1.97403	0.91447	0.74916	0.78788	0.71605
20	2.03896	0.97697	0.80936	0.82492	0.75926
22	2.0974	1.07566	0.88294	0.86195	0.79938
24	2.14935	1.15132	0.91639	0.91919	0.83642
26	2.19156	1.20724	0.94983	0.99327	0.88889
28	2.23377	1.27632	1.01672	1.05724	0.91049
31	2.28571	1.28289	1.08696	1.12121	1
34	2.33117	1.36513	1.11037	1.16162	1.02469
37	2.37078	1.4375	1.18729	1.22896	1.05247
41	2.41558	1.51316	1.20401	1.24242	1.12037
43	2.43539	1.64474	1.25084	1.3266	1.1358
48	2.4789	1.66776	1.34448	1.40404	1.20679
54	2.52175	1.6875	1.39799	1.47811	1.2963
61	2.56169	1.71711	1.53512	1.6532	1.33642
73	2.61364	1.74671	1.5786	1.6835	1.49691
84	2.65584	1.75658	1.59197	1.72391	1.52778
96	2.68474	1.78289	1.61204	1.74747	1.54321
118	2.72403		1.6388	1.80808	1.57716
142	2.75649		1.67224	1.85522	1.60494
165	2.77922		1.71572	1.88552	1.63272
201	2.80519				1.67901

[truncated: 11 more sheets: Fig.14, Fig.15a, Fig.16, Fig.17, Fig.S1, Fig.S3, Fig.S4, Fig.S5, Fig.S8, Fig.S9, Fig.S10]
