# Supplementary material for: Synthesis of “all-in-one” hypercrosslinked organic polymers: experimental and kinetic models for CO2 chemical fixation and iodine adsorption
Source: Royal Society of Chemistry journal article supplement (doi:10.1039/d4se01033g), 2024-01-01
Supplement: d4se01033g2.pdf [file d4se01033g2.pdf]

## Supporting Information

### **Synthesis of “all-in-one” hypercross-linked organic polymers: Experimental and kinetic models for CO<sub>2</sub> chemical fixation and iodine adsorption**

#### **Experimental**

All raw materials such as 1,4-bis (bromomethyl) benzene, N,N-dimethylethylenediamine, 1,2-dichloroethane, cyclohexane, methanol, phenol, butanophenol, octylphenol, dodecylphenol, pentadecylphenol were purchased from Aladdin Company. All epoxides used were purchased from Energy Chemical Reagents Co. Ltd. Chemicals are analytical grade and used directly without purification. The purity of CO<sub>2</sub> is 99.9% and was provided from Handan Anke Factory.

#### **Characterizations**

The FT-IR spectra were recorded on a Nicolet IS10 spectrometer ranging from 400 to 4000 cm<sup>-1</sup>. The <sup>13</sup>C CP MAS NMR spectrum was checked on a JNM-ECZ600R spectrometer. XPS spectra were collected by Thermo Fisher Scientific K-Alpha spectrometer using an Al K Alpha source, and calibrated with C1s peak at 284.8 eV with energy of 150.0 eV. SEM was recorded on a Hitachi SU-8020 microscope with an acceleration voltage of 3.0 kV. Nitrogen adsorption isotherm was obtained from a Micromeritics ASAP 2460 at 77 K, and the sample was degassed at 100°C for 6 h before

adsorption measurement. The basic sites of the samples were determined by temperature-programmed desorption (CO<sub>2</sub>-TPD) on a Micromeritics Autochem II 2920 instrument. The programmed temperature range was 30–350°C, and the heating rate was 10 °C min<sup>-1</sup>. CO<sub>2</sub> sorption isotherms were measured on a Micromeritics ASAP 2020 analyzer. The conversions of cyclic carbonates were detected on <sup>1</sup>H NMR spectra with a Bruker 400 spectrometer. The crude products were resolved in CDCl<sub>3</sub> in the presence of TMS as internal standard and the conversion was calculated on the proton peak area ration of ECH and product at 2.6 and 5.1 ppm. The products were determined by gas chromatography (FULI GC9720) using a flame ionization detector (FID) and a capillary column (30 m×0.32 mm×0.50 μm), the internal standard was ethyl acetate. Electronic (UV-Visible) spectra were recorded on a UV-3600 spectrophotometer, and measure the absorbance of the solution at 505 nm.

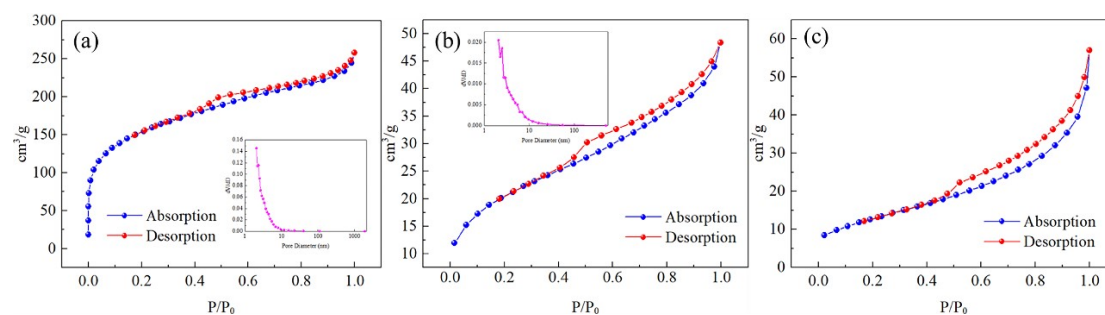

**Fig. S1.** N<sub>2</sub> adsorption and desorption isotherms and the pore size distribution of (a) HCP<sub>OH</sub>-C<sub>4</sub> (b) HCP<sub>OH</sub>-C<sub>8</sub> and (c) HCP<sub>OH</sub>-C<sub>15</sub>.

**Table S1** The yield (%) of HCP<sub>OH</sub>-C<sub>12</sub> catalyzed CO<sub>2</sub> cycloaddition reaction under different pressures <sup>a</sup>.

|                | 8 h | 12 h | 20 h |
|----------------|-----|------|------|
| <b>0.1 MPa</b> | 51  | 67   | 86   |
| <b>0.6 MPa</b> | 68  | 76   | 92   |
| <b>1.0 MPa</b> | 74  | 83   | 97   |

<sup>a</sup> Reaction conditions: ECH (15 mmol), catalysts (70 mg), 90°C.

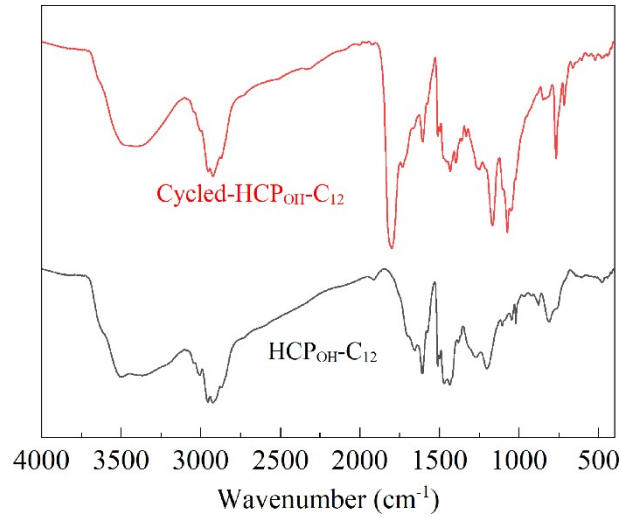

**Fig. S2.** FT-IR images of HCP<sub>OH</sub>-C<sub>12</sub> and Cycled-HCP<sub>OH</sub>-C<sub>12</sub>.

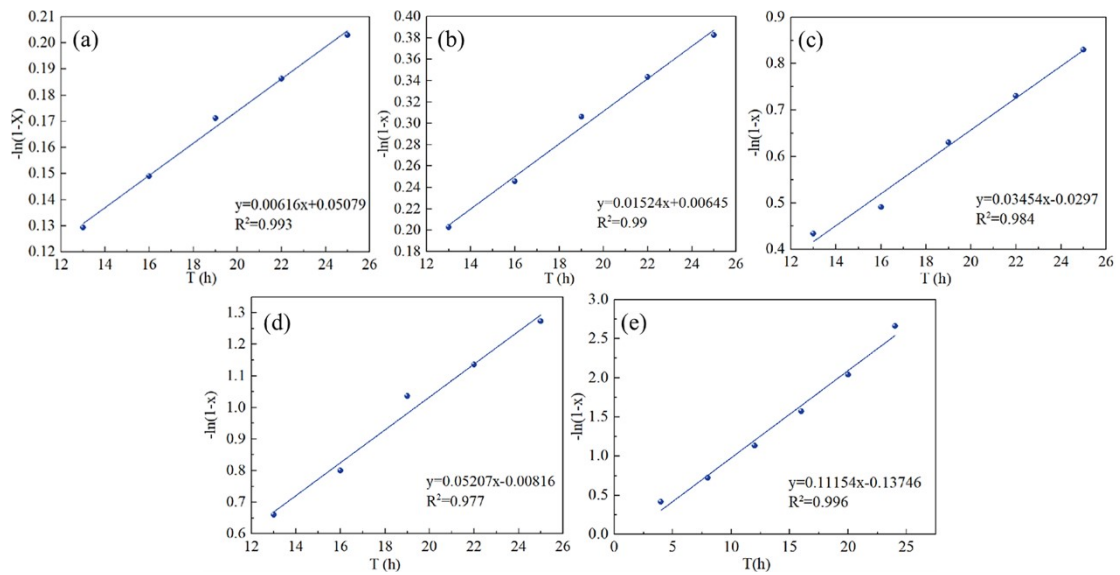

**Fig. S3.** Plot  $-\ln(1-x) - T(h)$  at different temperatures. (a) 50°C (b) 60°C (c) 70°C (d) 80°C (e) 90°C.

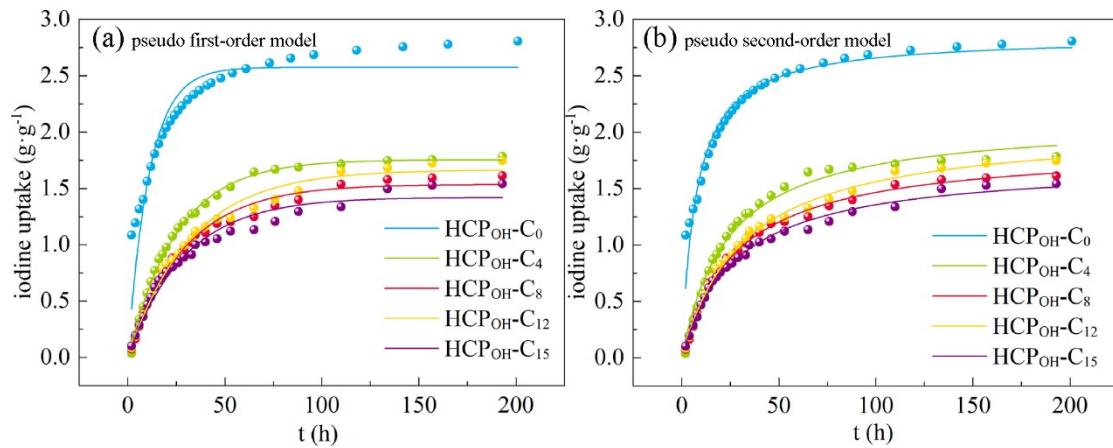

**Fig. S4.** Adsorption kinetics of iodine vapor on HCP<sub>OH</sub>-C<sub>n</sub>.

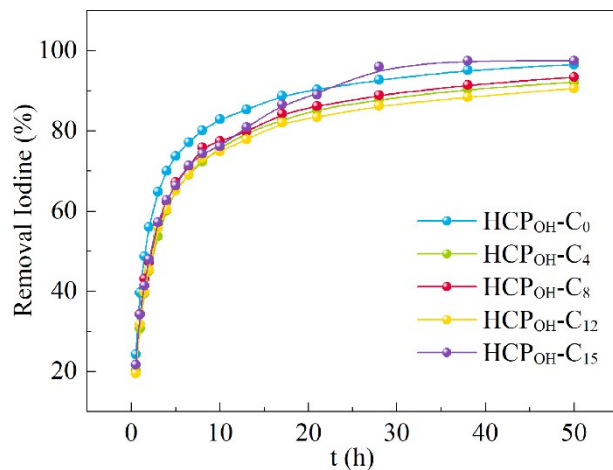

**Fig. S5.** Release of iodine upon heating  $\text{HCP}_{\text{OH}}\text{-C}_n@I_2$  at  $120^\circ\text{C}$ .

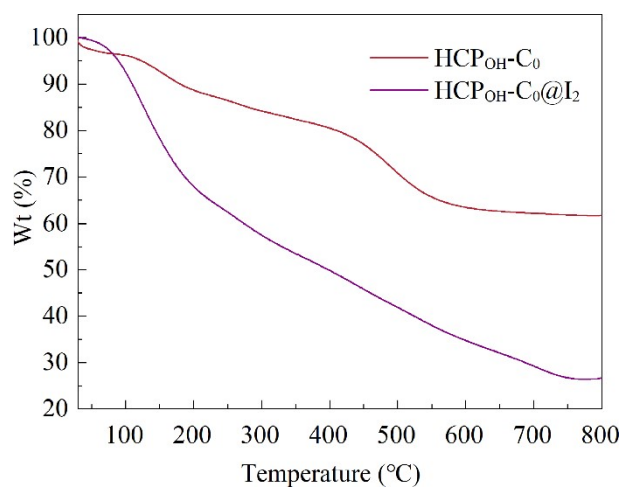

**Fig. S6.** TGA analysis of  $\text{HCP}_{\text{OH}}\text{-C}_0$  before and after iodine vapor adsorption.

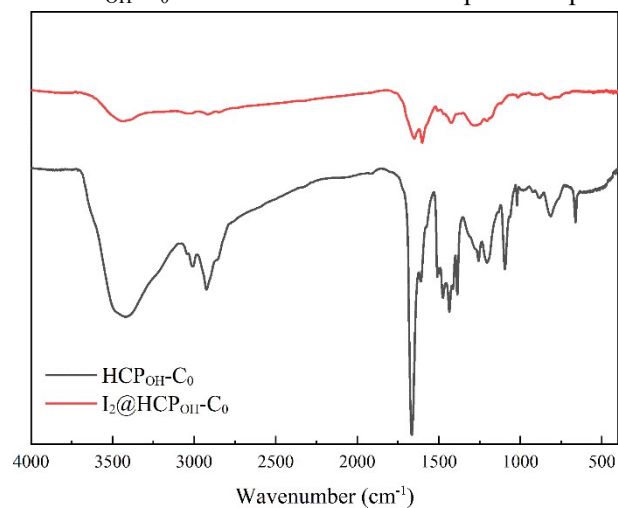

**Fig. S7.** FT-IR spectra of  $\text{HCP}_{\text{OH}}\text{-C}_0$  before and after adsorption of iodine vapor.

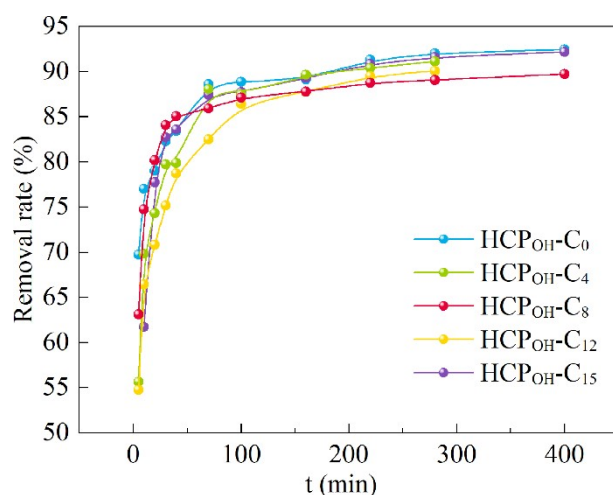

**Fig. S8.** The removal rate of iodine solution by HCP<sub>OH</sub>-C<sub>n</sub>.

**Table S2** Pseudo-first-order and pseudo-second-order kinetic parameters of iodine solution in HCP<sub>OH</sub>-C<sub>0</sub>

| Absorbent                         | Q <sub>e</sub><br>(mg·g <sup>-1</sup> ) | Pseudo first order kinetics            |                                         |                | Pseudo second order kinetics                               |                                         |                |
|-----------------------------------|-----------------------------------------|----------------------------------------|-----------------------------------------|----------------|------------------------------------------------------------|-----------------------------------------|----------------|
|                                   |                                         | K <sub>1</sub><br>(min <sup>-1</sup> ) | Q <sub>e</sub><br>(mg·g <sup>-1</sup> ) | R <sup>2</sup> | K <sub>2</sub><br>(mg·g <sup>-1</sup> ·min <sup>-1</sup> ) | Q <sub>e</sub><br>(mg·g <sup>-1</sup> ) | R <sup>2</sup> |
| HCP <sub>OH</sub> -C <sub>0</sub> | 177                                     | 0.26                                   | 169.9                                   | 0.73           | 0.002                                                      | 178                                     | 0.97           |

**Table S3** Langmuir and Freundlich parameters for iodine adsorption in cyclohexane solution.

|      | Langmuir model                         |                                                        |                | Freundlich model |        |                |
|------|----------------------------------------|--------------------------------------------------------|----------------|------------------|--------|----------------|
|      | Q <sub>max</sub> (mg·g <sup>-1</sup> ) | K <sub>L</sub> (L·mg <sup>-1</sup><br>l) <sup>1)</sup> | R <sup>2</sup> | K <sub>F</sub>   | 1/n    | R <sup>2</sup> |
| 298K | 247.56                                 | 0.03133                                                | 0.99           | 28.612           | 0.4032 | 0.96           |
| 308K | 252.81                                 | 0.03938                                                | 0.99           | 32.059           | 0.4001 | 0.97           |

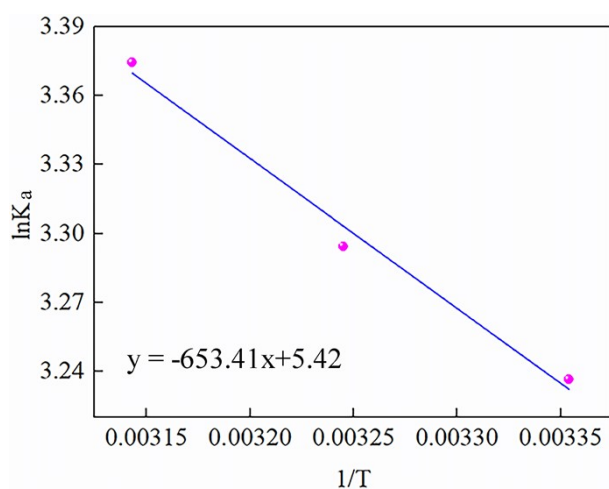

**Fig. S9.** Thermodynamic parameter diagram of HCP<sub>OH</sub>-C<sub>0</sub> adsorption in iodine solution.

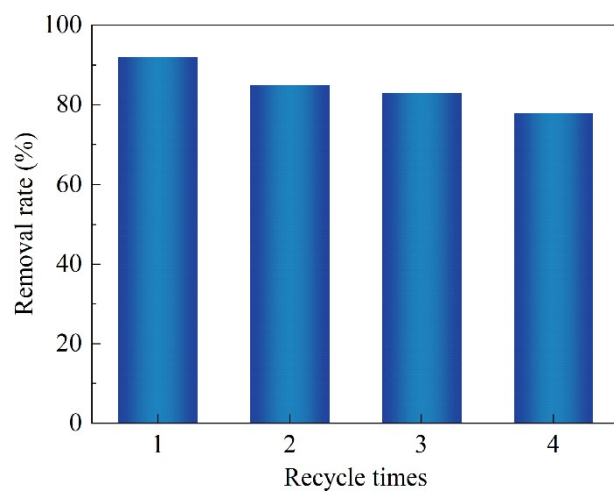

**Fig. S10.** Recyclability of HCP<sub>OH</sub>-C<sub>0</sub> for iodine solution after four regeneration cycles
